# Supplementary material
Source: PubMed Central journal article supplement (PMC5392242)
Supplement: NIHMS852500-supplement-supplement_1.pdf [file NIHMS852500-supplement-supplement_1.pdf]

## Supplemental Figure Legends

Supplemental Figure 1. Statistical analysis of microarray results for NMO serum- vs CON serum-treated cells.

Rat astroglial cultures were treated with 10% NMO serum or 10% CON serum for 24 hr. RNA was collected and processed for analysis on Illumina RatRef-12 BeadChips. Expression data was analyzed using the Stanford SAM package. With a false discovery rate (FDR) of 0.22 (22%), 270 genes were significantly regulated in NMO serum-treated samples as compared to CON serum treatment. Upregulated genes are shown in red; downregulated genes are shown in green.

Supplemental Figure 2. Pathways engaged in cells treated with NMO serum.

Microarray data generated as described in Supplemental Figure 1 were processed through the Ingenuity Pathway Analysis engine to identify genetic pathways that responded to treatment with NMO serum. Pathways of note include the acute phase response, NF $\kappa$ B signaling, and numerous cytokine, chemokine, and interleukin pathways.

Supplemental Figure 3. Statistical analysis of microarray results for NMO IgG- vs CON IgG-treated cells.

Rat astroglial cultures were treated with 750  $\mu$ g/mL NMO IgG or CON IgG for 24 hr. RNA was collected and processed for analysis on Illumina RatRef-12 BeadChips. Expression data was analyzed using the Stanford SAM package. With a false discovery rate (FDR) of 0.20 (20%), 3066 genes were significantly regulated in NMO IgG-treated samples as compared to CON IgG treatment. Upregulated genes are shown in red; downregulated genes are shown in green.

Supplemental Figure 4. Pathways engaged in cells treated with NMO IgG.

Microarray data generated as described in Supplemental Figure 2 were processed through the Ingenuity Pathway Analysis engine to identify genetic pathways that responded to treatment with NMO IgG. Pathways of note include oxidative stress responses and numerous cytokine, chemokine, and interleukin response pathways.

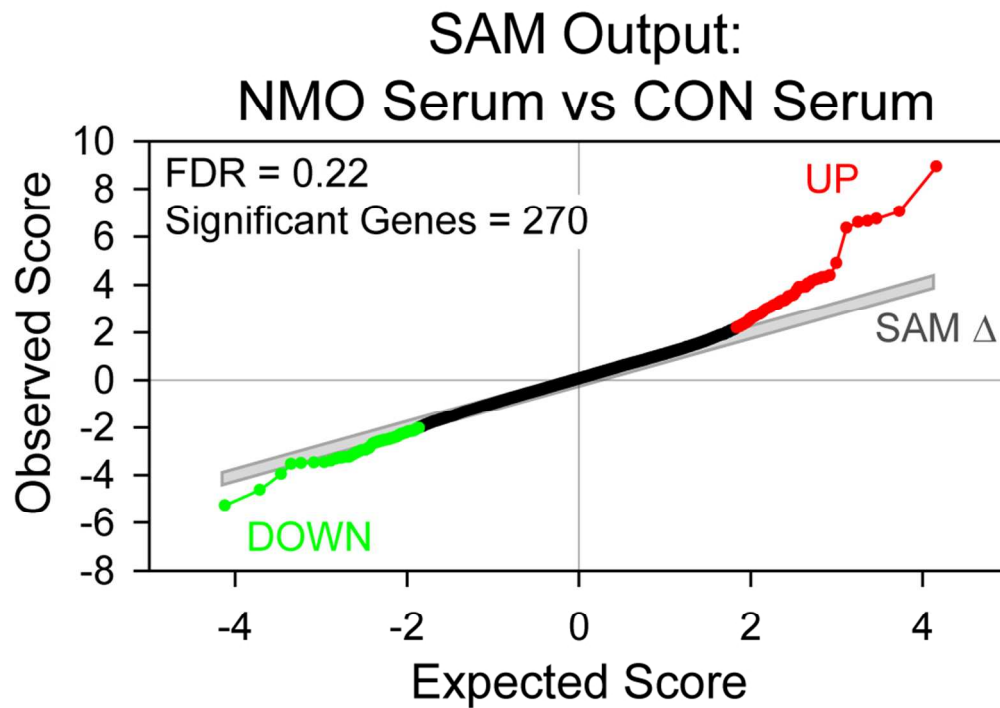

Supplemental Figure 1. Statistical analysis of microarray results for NMO serum- vs CON serum-treated cells.

Rat astroglial cultures were treated with 10% NMO serum or 10% CON serum for 24 hr. RNA was collected and processed for analysis on Illumina RatRef-12 BeadChips. Expression data was analyzed using the Stanford SAM package. With a false discovery rate (FDR) of 0.22 (22%), 270 genes were significantly regulated in NMO serum-treated samples as compared to CON serum treatment. Upregulated genes are shown in red; downregulated genes are shown in green.

88x62mm (300 x 300 DPI)

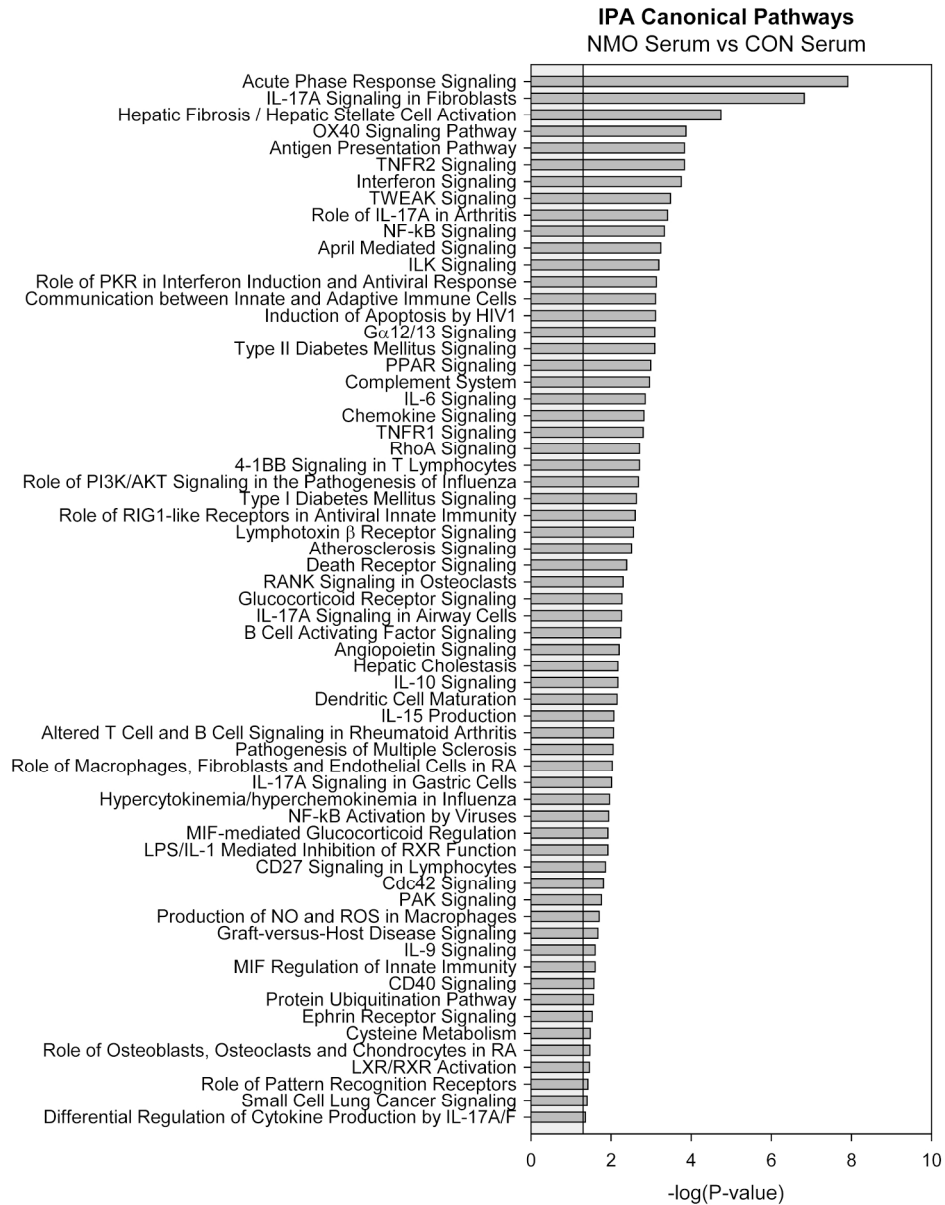

Supplemental Figure 2. Pathways engaged in cells treated with NMO serum. Microarray data generated as described in Supplemental Figure 1 were processed through the Ingenuity Pathway Analysis engine to identify genetic pathways that responded to treatment with NMO serum. Pathways of note include the acute phase response, NFκB signaling, and numerous cytokine, chemokine, and interleukin pathways.

176x228mm (300 x 300 DPI)

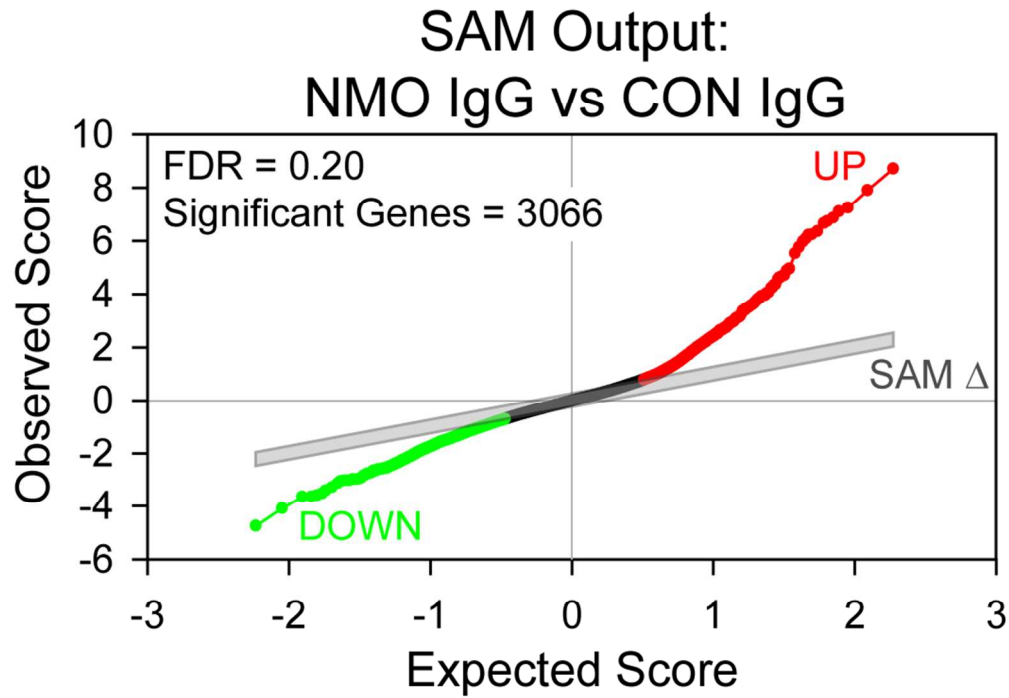

Supplemental Figure 3. Statistical analysis of microarray results for NMO IgG- vs CON IgG-treated cells. Rat astroglial cultures were treated with 750  $\mu\text{g}/\text{mL}$  NMO IgG or CON IgG for 24 hr. RNA was collected and processed for analysis on Illumina RatRef-12 BeadChips. Expression data was analyzed using the Stanford SAM package. With a false discovery rate (FDR) of 0.20 (20%), 3066 genes were significantly regulated in NMO IgG-treated samples as compared to CON IgG treatment. Upregulated genes are shown in red; downregulated genes are shown in green.

89x62mm (300 x 300 DPI)

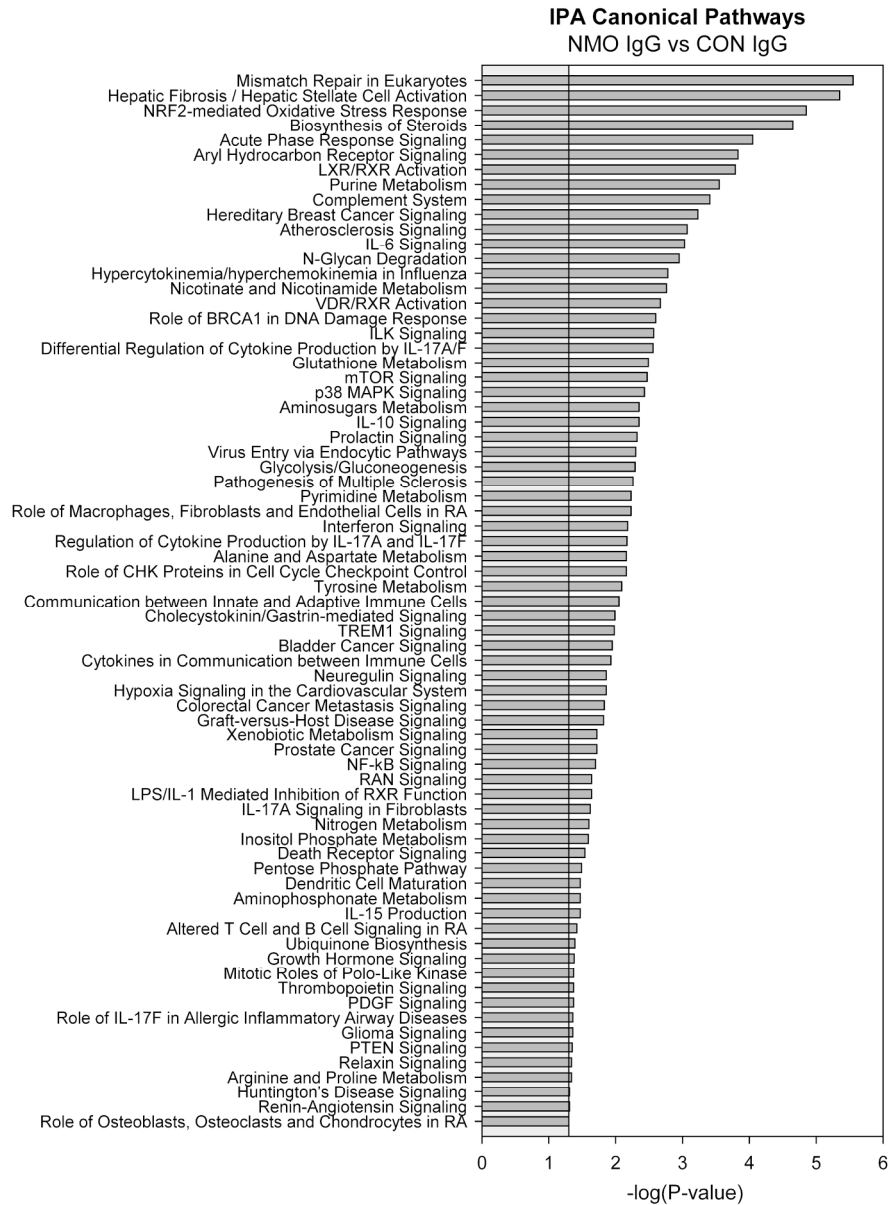

Supplemental Figure 4. Pathways engaged in cells treated with NMO IgG. Microarray data generated as described in Supplemental Figure 2 were processed through the Ingenuity Pathway Analysis engine to identify genetic pathways that responded to treatment with NMO IgG. Pathways of note include oxidative stress responses and numerous cytokine, chemokine, and interleukin response pathways.

166x227mm (300 x 300 DPI)

## Supplemental Table 1

NMO Serum vs Control Serum, Significantly Upregulated Genes at FDR  $\leq$  0.22

| Gene Symbol | Entrez ID | Gene                                                 | SAM score <sup>1</sup> | Fold Change <sup>2</sup> | FDR-cutoff <sup>3</sup> |
|-------------|-----------|------------------------------------------------------|------------------------|--------------------------|-------------------------|
| CXCL1       | 81503     | chemokine (C-X-C) ligand 1                           | 8.82                   | 39.5                     | 0                       |
| NFKBIA      | 25493     | nuclear factor of kappa B inhibitor, alpha           | 6.93                   | 3.6                      | 0                       |
| PLA1A       | 85311     | phospholipase A1 member A                            | 6.61                   | 2.2                      | 0                       |
| ANGPTL4     | 362850    | angiopoietin-like 4                                  | 6.51                   | 2.8                      | 0                       |
| CCL5        | 81780     | chemokine (C-C) ligand 5                             | 6.46                   | 6.6                      | 0                       |
| TESC        | 288689    | tescalcin                                            | 6.22                   | 2.2                      | 0                       |
| IL1RN       | 60582     | interleukin 1 receptor antagonist                    | 4.77                   | 6.8                      | 0                       |
| MT3         | 117038    | metallothionein 3                                    | 4.27                   | 2.0                      | 0                       |
| GDA         | 83585     | guanine deaminase                                    | 4.19                   | 4.7                      | 0                       |
| CCL2        | 24770     | chemokine (C-C) ligand 2                             | 4.19                   | 16.1                     | 0                       |
| C3          | 24232     | complement component 3                               | 4.14                   | 33.7                     | 0                       |
| Atoh8       | 500200    | atonal homolog 8                                     | 4.10                   | 2.0                      | 0                       |
| LCN2        | 170496    | lipocalin 2                                          | 4.03                   | 49.8                     | 0                       |
| PSMB10      | 291983    | proteasome subunit B10                               | 3.93                   | 1.5                      | 0                       |
| CCL11       | 29397     | chemokine (C-C) ligand 11                            | 3.93                   | 1.5                      | 0                       |
| FKBP5       | 361810    | FK506 binding protein 5                              | 3.79                   | 2.4                      | 0                       |
| CCL20       | 29538     | chemokine (C-C) ligand 20                            | 3.79                   | 52.1                     | 0                       |
| CCL19       | 362506    | chemokine (C-C) ligand 19                            | 3.78                   | 1.9                      | 0                       |
| PLET1       | 363060    | placenta-expressed transcript 1                      | 3.78                   | 2.8                      | 0                       |
| SLC11A2     | 25715     | solute carrier family 11, member 2                   | 3.78                   | 4.2                      | 0                       |
| EHD3        | 192249    | EH-domain containing 3                               | 3.66                   | 1.6                      | 0                       |
| RT1-149     | 414784    | MHC class I RT1-T24                                  | 3.55                   | 2.3                      | 0                       |
| KLF5        | 84410     | Kruppel-like factor 5                                | 3.45                   | 1.9                      | 0                       |
| P4HB        | 25506     | prolyl 4-hydroxylase, beta polypeptide               | 3.44                   | 1.3                      | 0                       |
| CCL7        | 287561    | chemokine (C-C) ligand 7                             | 3.43                   | 13.0                     | 0                       |
| WDYHV1      | 362914    | WDYHV motif-containing 1                             | 3.40                   | 1.6                      | 0                       |
| FABP4       | 79451     | fatty acid binding protein 4                         | 3.39                   | 1.9                      | 0                       |
| LOC360228   | 360228    | WDNM1 homolog                                        | 3.38                   | 2.1                      | 0                       |
| CXCL11      | 305236    | chemokine (C-X-C) ligand 11                          | 3.31                   | 2.7                      | 2                       |
| AMPD3       | 25095     | adenosine monophosphate deaminase 3                  | 3.27                   | 2.2                      | 2                       |
| TF          | 24825     | transferrin                                          | 3.25                   | 4.8                      | 2                       |
| ASS1        | 25698     | argininosuccinate synthetase 1                       | 3.23                   | 2.8                      | 2                       |
| HOPX        | 171160    | HOP homeobox                                         | 3.22                   | 4.0                      | 2                       |
| RT1-M6-2    | 365527    | MHC class I RT1-M6                                   | 3.21                   | 2.0                      | 2                       |
| RT1-CE15    | 414789    | MHC class I RT1-CE15                                 | 3.21                   | 2.0                      | 2                       |
| PTGR1       | 192227    | prostaglandin reductase 1                            | 3.21                   | 1.7                      | 2                       |
| FAM46C      | 310721    | family with sequence similarity 46, C                | 3.20                   | 1.7                      | 2                       |
| TLR2        | 310553    | toll-like receptor 2                                 | 3.15                   | 4.3                      | 4                       |
| MT1A        | 24567     | metallothionein 1a                                   | 3.14                   | 5.5                      | 4                       |
| HS3ST1      | 84406     | heparan sulfate (glucosamine) 3-O-sulfotransferase 1 | 3.10                   | 1.7                      | 4                       |
| NFKBIZ      | 304005    | nuclear factor of kappa B inhibitor, zeta            | 3.09                   | 1.9                      | 4                       |
| RGD1559845  | 308494    | similar to SPBPJ4664.02                              | 3.07                   | 1.7                      | 4                       |
| NOV         | 81526     | nephroblastoma overexpressed gene                    | 3.05                   | 1.6                      | 4                       |
| ABCB1B      | 24646     | ATP-binding cassette, subfamily B1B                  | 3.04                   | 4.9                      | 4                       |
| CPT1A       | 25757     | carnitine palmitoyltransferase 1a                    | 3.02                   | 1.9                      | 4                       |
| IFI204      | 304988    | interferon activated gene 204                        | 3.02                   | 2.7                      | 4                       |
| PSME2       | 29614     | proteasome activator subunit 2                       | 3.01                   | 1.6                      | 6                       |
| NDRG2       | 171114    | N-myc downstream regulated gene 2                    | 3.00                   | 2.1                      | 6                       |
| SMPD3       | 94338     | sphingomyelin phosphodiesterase 3                    | 2.96                   | 1.8                      | 6                       |
| IRF1        | 24508     | interferon regulatory factor 1                       | 2.95                   | 1.6                      | 6                       |
| TAPBP       | 25217     | TAP binding protein                                  | 2.93                   | 1.8                      | 6                       |
| IFNGR2      | 360697    | interferon gamma receptor 2                          | 2.92                   | 1.5                      | 6                       |
| RT1-A2      | 24974     | MHC class I RT1-A2                                   | 2.91                   | 2.9                      | 6                       |
| SLPI        | 84386     | secretory leukocyte peptidase inhibitor              | 2.90                   | 1.7                      | 6                       |
| BMP7        | 85272     | bone morphogenetic protein 7                         | 2.89                   | 1.7                      | 6                       |
| STIM1       | 361618    | stromal interaction molecule 1                       | 2.88                   | 1.6                      | 6                       |
| BIRC3       | 78971     | inhibitor of apoptosis 1                             | 2.87                   | 1.9                      | 6                       |
| RT1-M10-1   | 414787    | MHC class I RT1-M10                                  | 2.87                   | 2.4                      | 6                       |
| ADAMTS2     | 287899    | ADAM metalloproteinase, thrombospondin 2             | 2.86                   | 2.4                      | 6                       |
| OSMR        | 310132    | oncostatin M receptor                                | 2.84                   | 1.4                      | 6                       |
| SLC25A21    | 171151    | solute carrier family 25, member 21                  | 2.83                   | 1.6                      | 6                       |
| NFKBIE      | 316241    | nuclear factor of kappa B inhibitor, epsilon         | 2.79                   | 2.1                      | 8                       |
| CXCL16      | 497942    | chemokine (C-X-C) ligand 16                          | 2.79                   | 1.9                      | 8                       |

|            |        |                                                      |      |     |    |
|------------|--------|------------------------------------------------------|------|-----|----|
| TIFA       | 310877 | TRAF-interacting protein, forkhead-associated domain | 2.79 | 2.0 | 8  |
| IL13RA2    | 171060 | interleukin 13 receptor, alpha 2                     | 2.76 | 1.7 | 8  |
| RT1-A1     | 24973  | MHC class I RT1-A1                                   | 2.73 | 2.6 | 9  |
| GOLSYN     | 500865 | golgi-localized protein                              | 2.71 | 1.4 | 9  |
| GPHN       | 64845  | gephyrin                                             | 2.70 | 1.3 | 9  |
| ACSBG1     | 171410 | acyl-CoA synthetase bubblegum family member 1        | 2.69 | 2.3 | 9  |
| CFB        | 294257 | complement factor B                                  | 2.69 | 6.9 | 9  |
| ZMYM6      | 362602 | zinc finger, MYM-type 6                              | 2.66 | 1.4 | 9  |
| C1R        | 312705 | complement component 1r                              | 2.64 | 3.1 | 9  |
| FAM43A     | 288031 | family with sequence similarity 43, member A         | 2.64 | 2.0 | 9  |
| GCLC       | 25283  | glutamate-cysteine ligase, catalytic subunit         | 2.63 | 1.6 | 9  |
| RGD1564088 | 291290 | similar to 60S ribosomal protein L29 (P23)           | 2.63 | 1.2 | 9  |
| TAP2       | 24812  | transporter 2, ATP-binding cassette, sub-family B    | 2.63 | 1.5 | 9  |
| ZC3H12A    | 313587 | zinc finger CCCH type containing 12A                 | 2.63 | 2.0 | 9  |
| USP53      | 295425 | ubiquitin specific peptidase 53                      | 2.62 | 1.7 | 9  |
| ADM        | 25026  | adrenomedullin                                       | 2.61 | 2.1 | 9  |
| NT5C1B     | 298881 | 5'-nucleotidase, cytosolic 1B                        | 2.60 | 2.0 | 9  |
| IL1F8      | 362076 | interleukin 1 family, member 8                       | 2.56 | 1.5 | 9  |
| SPSB1      | 313722 | splA/ryanodine receptor domain, SOCS box 1           | 2.56 | 1.4 | 9  |
| ERRF1      | 313729 | ERBB receptor feedback inhibitor 1                   | 2.55 | 1.6 | 9  |
| CEBPB      | 24253  | CCAAT/enhancer binding protein (C/EBP), beta         | 2.53 | 3.0 | 11 |
| RT1-A3     | 309627 | MHC class I RT1-A3                                   | 2.52 | 2.6 | 11 |
| TRAF2      | 311786 | TNF receptor-associated factor 2                     | 2.52 | 1.5 | 11 |
| ITGA10     | 310683 | integrin, alpha 10                                   | 2.51 | 1.3 | 11 |
| RGD1561089 | 499664 | RGD1561089                                           | 2.51 | 1.2 | 11 |
| BCL3       | 680611 | B-cell CLL/lymphoma 3                                | 2.51 | 1.6 | 11 |
| RARRS2     | 297073 | retinoic acid receptor responder 2                   | 2.50 | 1.7 | 11 |
| FST        | 24373  | folistatin                                           | 2.49 | 1.7 | 11 |
| FAM128B    | 287929 | family with sequence similarity 128, member B        | 2.48 | 1.6 | 12 |
| SOD2       | 24787  | superoxide dismutase 2, mitochondrial                | 2.48 | 4.6 | 12 |
| CLCC1      | 170927 | chloride channel CLIC-like 1                         | 2.47 | 1.3 | 12 |
| CP         | 24268  | ceruloplasmin                                        | 2.44 | 5.8 | 13 |
| RSPO2      | 500863 | R-spondin 2 homolog                                  | 2.42 | 2.2 | 13 |
| FAM19A2    | 680647 | family with sequence similarity 19, member A2        | 2.42 | 1.2 | 13 |
| CDO1       | 81718  | cysteine dioxygenase, type I                         | 2.42 | 2.0 | 13 |
| NFKB2      | 309452 | nuclear factor of kappa B2, p49/p100                 | 2.40 | 1.9 | 13 |
| TAP1       | 24811  | transporter 1, ATP-binding cassette, sub-family B    | 2.39 | 1.8 | 13 |
| FIGF       | 360457 | vascular endothelial growth factor D                 | 2.37 | 2.3 | 14 |
| C1S        | 192262 | complement component 1s                              | 2.36 | 5.2 | 14 |
| MPV17L2    | 290645 | MPV17 mitochondrial membrane protein-like 2          | 2.35 | 1.5 | 14 |
| EPAS1      | 29452  | endothelial PAS domain protein 1                     | 2.33 | 1.3 | 14 |
| SLC26A6    | 301010 | solute carrier family 26, member 6                   | 2.31 | 1.4 | 15 |
| GPD1       | 60666  | glycerol-3-phosphate dehydrogenase 1                 | 2.31 | 1.6 | 15 |
| PPAP2B     | 192270 | phosphatidic acid phosphatase type 2B                | 2.30 | 1.9 | 15 |
| ADORA2B    | 29316  | adenosine A2B receptor                               | 2.28 | 3.0 | 15 |
| RGD1560703 | 502535 | similar to coated vesicle membrane protein           | 2.28 | 1.2 | 15 |
| TNIP1      | 363599 | TNFAIP3 interacting protein 1                        | 2.27 | 2.3 | 16 |
| RGD1562351 | 499990 | similar to chromosome 7 open reading frame 23        | 2.26 | 1.3 | 16 |
| MX1        | 24575  | myxovirus (influenza virus) resistance 1             | 2.26 | 1.3 | 16 |
| EYA2       | 156826 | eyes absent homolog 2                                | 2.26 | 1.6 | 16 |
| KLHL29     | 298867 | kelch-like 29                                        | 2.25 | 1.4 | 16 |
| PCDH19     | 317183 | protocadherin 19                                     | 2.25 | 1.8 | 16 |
| AGTR1A     | 24180  | angiotensin II receptor, type 1a                     | 2.24 | 2.8 | 16 |
| CDC42EP5   | 361505 | CDC42 effector protein 5                             | 2.24 | 1.3 | 16 |
| DEPDC7     | 295971 | DEP domain containing 7                              | 2.23 | 1.3 | 16 |
| TNFSF13    | 287437 | tumor necrosis factor superfamily, member 13         | 2.23 | 1.7 | 16 |
| ATP5G3     | 114630 | ATP synthase, H+ transporting, subunit C3            | 2.21 | 1.2 | 16 |
| PLAC8      | 360914 | placenta-specific 8                                  | 2.21 | 3.4 | 16 |
| FMO1       | 25256  | flavin containing monooxygenase 1                    | 2.20 | 1.8 | 16 |
| ECI2       | 291075 | enoyl-Coenzyme A delta isomerase 2                   | 2.20 | 1.4 | 16 |
| LRP11      | 292462 | low density lipoprotein receptor-related protein 11  | 2.19 | 2.0 | 16 |
| GBP5       | 362050 | guanylate binding protein 5                          | 2.19 | 1.3 | 16 |
| AMIGO2     | 300186 | adhesion molecule with Ig like domain 2              | 2.19 | 1.9 | 16 |
| DPM3-PS1   | 692000 | dolichyl-phosphate mannosyltransferase polypeptide 3 | 2.19 | 1.3 | 16 |
| RNF125     | 361296 | ring finger protein 125                              | 2.18 | 3.9 | 16 |
| VCAM1      | 25361  | vascular cell adhesion molecule 1                    | 2.17 | 2.9 | 18 |
| CRYBA1     | 25583  | crystallin, beta A1                                  | 2.15 | 1.2 | 18 |
| AKR7A2     | 171445 | aldo-keto reductase family 7, member A2              | 2.15 | 1.3 | 18 |
| GCH1       | 29244  | GTP cyclohydrolase 1                                 | 2.15 | 1.7 | 18 |

|            |        |                                                 |      |     |    |
|------------|--------|-------------------------------------------------|------|-----|----|
| RGD1306811 | 300517 | similar to hypothetical protein FLJ25530        | 2.15 | 1.6 | 18 |
| GCGR       | 24953  | glucagon receptor                               | 2.14 | 1.8 | 18 |
| CDC42EP4   | 303653 | CDC42 effector protein 4                        | 2.13 | 1.3 | 18 |
| MGLL       | 29254  | monoglyceride lipase                            | 2.12 | 1.9 | 18 |
| APOL9A     | 503164 | apolipoprotein L 9a                             | 2.12 | 1.2 | 18 |
| NEURL3     | 316326 | neuralized homolog 3                            | 2.12 | 1.7 | 18 |
| RGD1565210 | 499072 | RGD1565210                                      | 2.12 | 1.3 | 22 |
| ALKBH2     | 304578 | alkB, alkylation repair homolog 2               | 2.11 | 1.2 | 22 |
| FGR        | 79113  | fgr tyrosine kinase                             | 2.11 | 1.3 | 22 |
| RBM43      | 311020 | RNA binding motif protein 43                    | 2.11 | 1.3 | 22 |
| CRHR1      | 58959  | corticotropin releasing hormone receptor 1      | 2.11 | 1.2 | 22 |
| PSMB8      | 24968  | proteasome subunit B8                           | 2.11 | 1.6 | 22 |
| SULT5A1    | 292077 | sulfotransferase family 5A1                     | 2.10 | 1.2 | 22 |
| CMPK2      | 314004 | cytidine monophosphate kinase 2                 | 2.10 | 1.7 | 22 |
| NFKBID     | 308496 | nuclear factor of kappa B inhibitor, delta      | 2.09 | 1.2 | 22 |
| SULT1A1    | 83783  | sulfotransferase family, cytosolic, 1A          | 2.09 | 4.4 | 22 |
| FAM108C1   | 361601 | family with sequence similarity 108, member C1  | 2.08 | 1.4 | 22 |
| RAMP2      | 58966  | G protein-coupled receptor activity modifying 2 | 2.08 | 2.8 | 22 |
| C1QTNF1    | 303701 | C1q and tumor necrosis factor related protein 1 | 2.07 | 1.4 | 22 |
| FMO4       | 246247 | flavin containing monooxygenase 4               | 2.07 | 2.0 | 22 |

<sup>1</sup>SAM (significance analysis of microarray) score = d(i); similar to t-test t-score

<sup>2</sup>Fold change NMO serum Tx vs CON serum Tx; generated by SAM

<sup>3</sup>SAM false discovery rate cut-off value = q; table is grouped by FDR≤0.05, FDR≤0.1, FDR≤0.22



**Supplemental Table 2**NMO Serum vs Control Serum, Significantly Downregulated Genes at FDR  $\leq$  0.22

| Gene Symbol | Entrez ID | Gene                                              | SAM score <sup>1</sup> | Fold Change <sup>2</sup> | FDR-cutoff <sup>3</sup> |
|-------------|-----------|---------------------------------------------------|------------------------|--------------------------|-------------------------|
| TSPAN6      | 302313    | tetraspanin 6                                     | -5.39                  | -1.5                     | 0                       |
| SH3BP5      | 117186    | SH3-domain binding protein 5                      | -4.74                  | -1.6                     | 0                       |
| ZNF711      | 302327    | zinc finger protein 711                           | -4.08                  | -2.6                     | 0                       |
| PCDH18      | 295027    | protocadherin 18                                  | -3.67                  | -2.0                     | 8                       |
| GJA4        | 25655     | gap junction protein, alpha 4                     | -3.63                  | -2.3                     | 8                       |
| PDGFRB      | 24629     | platelet derived growth factor receptor, beta     | -3.60                  | -1.8                     | 8                       |
| ARHGEF2     | 310635    | rho/rac guanine nucleotide exchange factor 2      | -3.59                  | -1.5                     | 8                       |
| COL5A2      | 85250     | collagen type V, alpha 2                          | -3.53                  | -1.4                     | 8                       |
| STRN3       | 114520    | striatin, calmodulin binding protein 3            | -3.44                  | -1.4                     | 8                       |
| BAMBI       | 83837     | BMP and activin membrane-bound inhibitor, homolog | -3.41                  | -1.9                     | 8                       |
| CREBZF      | 293112    | CREB/ATF bZIP transcription factor                | -3.41                  | -1.5                     | 8                       |
| PQLC3       | 298906    | PQ loop repeat containing 3                       | -3.37                  | -1.7                     | 8                       |
| NID67       | 286910    | small membrane protein NID67                      | -3.37                  | -1.5                     | 8                       |
| CXXC5       | 291670    | CXXC finger 5                                     | -3.31                  | -1.5                     | 9                       |
| TSPAN2      | 64521     | tetraspanin 2                                     | -3.26                  | -1.5                     | 9                       |
| RABEP1      | 54190     | rabaptin                                          | -3.22                  | -1.2                     | 9                       |
| MMP16       | 65205     | matrix metalloproteinase 16                       | -3.18                  | -1.2                     | 9                       |
| POU3F2      | 29588     | POU class 3 homeobox 2                            | -3.15                  | -1.3                     | 9                       |
| ARMCX2      | 367903    | armadillo repeat containing, X-linked 2           | -3.10                  | -1.6                     | 9                       |
| TDRD7       | 85425     | tudor domain containing 7                         | -3.09                  | -1.4                     | 9                       |
| DLK1        | 114587    | delta-like 1 homolog                              | -3.08                  | -1.7                     | 9                       |
| ZFP362      | 297879    | zinc finger protein 362                           | -3.08                  | -1.6                     | 9                       |
| FERMT2      | 289992    | fermitin family homolog 2                         | -3.03                  | -1.5                     | 11                      |
| FAM110B     | 500400    | family with sequence similarity 110B              | -3.02                  | -1.4                     | 11                      |
| PTK2B       | 50646     | PTK2B protein tyrosine kinase 2B                  | -2.97                  | -1.3                     | 12                      |
| STC1        | 81801     | stanniocalcin 1                                   | -2.86                  | -2.9                     | 14                      |
| RASA1       | 25676     | RAS p21 protein activator 1                       | -2.80                  | -1.8                     | 14                      |
| RAI14       | 294804    | RAS p21 protein activator                         | -2.80                  | -1.4                     | 14                      |
| SCHIP1      | 295105    | schwannomin interacting protein 1                 | -2.79                  | -1.6                     | 14                      |
| LOC365985   | 365985    | similar to adenylate kinase 5                     | -2.78                  | -1.4                     | 14                      |
| PITPNA      | 29525     | phosphatidylinositol transfer protein, alpha      | -2.78                  | -1.5                     | 14                      |
| MYH10       | 79433     | myosin heavy chain 10                             | -2.76                  | -1.6                     | 14                      |
| UGP2        | 289827    | UDP-glucose pyrophosphorylase 2                   | -2.75                  | -1.5                     | 14                      |
| PRKRA       | 311130    | protein kinase, IFN inducible dsRNA-dep activator | -2.74                  | -1.2                     | 14                      |
| KANK1       | 309429    | KN motif and ankyrin repeat domains 1             | -2.72                  | -1.6                     | 14                      |
| SERTAD4     | 360899    | SERTA domain containing 4                         | -2.71                  | -1.8                     | 14                      |
| SERPINF1    | 287526    | serpin peptidase inhibitor, clade F 1             | -2.71                  | -1.5                     | 14                      |
| SCAND3      | 288622    | SCAN domain containing 3                          | -2.70                  | -1.2                     | 14                      |
| USP13       | 310306    | ubiquitin specific protease 13                    | -2.68                  | -1.5                     | 15                      |
| ETS1        | 24356     | Ets-1                                             | -2.67                  | -1.4                     | 15                      |
| SAMD4A      | 305826    | sterile alpha motif domain containing 4A          | -2.67                  | -1.4                     | 15                      |
| LHFB        | 499615    | lipoma HMGIC fusion partner                       | -2.66                  | -1.3                     | 15                      |
| UBA3        | 117553    | ubiquitin-like modifier activating enzyme 3       | -2.66                  | -1.3                     | 15                      |
| HABP4       | 361196    | hyaluronan binding protein 4                      | -2.65                  | -1.3                     | 15                      |
| PHLDA1      | 29380     | pleckstrin homology-like domain A1                | -2.64                  | -1.5                     | 15                      |
| SH2B3       | 58838     | SH2B adaptor protein 3                            | -2.64                  | -1.5                     | 15                      |
| DOCK6       | 367039    | dedicator of cytokinesis 6                        | -2.63                  | -1.3                     | 15                      |
| LAMB1       | 298941    | laminin, beta 1                                   | -2.63                  | -1.4                     | 15                      |
| SPAG9       | 360600    | sperm associated antigen 9                        | -2.61                  | -1.4                     | 15                      |
| PRPH        | 24688     | peripherin                                        | -2.60                  | -1.3                     | 15                      |
| LRRFIP1     | 367314    | leucine rich repeat interacting protein 1         | -2.59                  | -1.3                     | 15                      |
| CNN1        | 65204     | calponin 1, basic                                 | -2.59                  | -2.2                     | 15                      |
| MID1IP1     | 404280    | MID1 interacting protein 1                        | -2.58                  | -1.4                     | 15                      |
| PKP2        | 287925    | plakophilin 2                                     | -2.58                  | -1.7                     | 15                      |
| RNF138      | 94196     | ring finger protein 138                           | -2.57                  | -1.3                     | 15                      |
| TES         | 500040    | testis derived transcript                         | -2.56                  | -1.6                     | 15                      |
| ZC3H6       | 311415    | zinc finger CCCH type containing 6                | -2.55                  | -1.3                     | 15                      |
| KRCC1       | 312437    | lysine-rich coiled-coil 1                         | -2.54                  | -1.3                     | 15                      |
| TEC         | 84492     | tec protein tyrosine kinase                       | -2.54                  | -1.5                     | 15                      |
| SNAPC3      | 362537    | small nuclear RNA activating complex p3           | -2.53                  | -1.4                     | 15                      |
| SERINC2     | 313057    | serine incorporator 2                             | -2.53                  | -1.4                     | 15                      |
| SDC2        | 25615     | syndecan 2                                        | -2.52                  | -1.6                     | 15                      |
| DZIP1L      | 315952    | DAZ interacting protein 1-like                    | -2.50                  | -1.4                     | 15                      |

|            |        |                                                       |       |      |    |
|------------|--------|-------------------------------------------------------|-------|------|----|
| DAB2IP     | 192126 | DAB2 interacting protein                              | -2.50 | -1.4 | 15 |
| VPS37B     | 288659 | vacuolar protein sorting 37 homolog B                 | -2.48 | -1.3 | 16 |
| CALD1      | 25687  | caldesmon 1                                           | -2.46 | -1.8 | 16 |
| GM672      | 364900 | gene model 672                                        | -2.45 | -1.2 | 16 |
| CXCR4      | 60628  | chemokine (C-X-C) receptor 4                          | -2.44 | -1.3 | 16 |
| RGD1566247 | 295554 | similar to 40S ribosomal protein S2                   | -2.44 | -1.3 | 16 |
| NKX2-2     | 366214 | NK2 homeobox 2                                        | -2.42 | -1.3 | 16 |
| CASK       | 29647  | calcium/calmodulin-dependent serine protein kinase    | -2.41 | -1.5 | 16 |
| JUB        | 85265  | jub, ajuba homolog                                    | -2.41 | -1.6 | 16 |
| DOCK1      | 309081 | dedicator of cyto-kinesis 1                           | -2.41 | -1.4 | 16 |
| CLIP3      | 308493 | CAP-GLY domain containing linker protein 3            | -2.40 | -1.3 | 16 |
| KRT19      | 360626 | keratin 19                                            | -2.40 | -1.7 | 16 |
| TACC2      | 309025 | transforming, acidic coiled-coil containing protein 2 | -2.39 | -1.3 | 16 |
| DBNDD2     | 499941 | dysbindin domain containing 2                         | -2.37 | -1.6 | 16 |
| ZC3H14     | 192359 | zinc finger CCCH type containing 14                   | -2.37 | -1.3 | 16 |
| BTRC       | 361765 | beta-transducin repeat containing                     | -2.37 | -1.3 | 16 |
| MPPED2     | 362185 | metallophosphoesterase domain containing 2            | -2.36 | -1.3 | 16 |
| TTC9       | 500689 | tetratricopeptide repeat domain 9                     | -2.36 | -1.7 | 16 |
| RIPK3      | 246240 | receptor-interacting serine-threonine kinase 3        | -2.35 | -1.4 | 16 |
| NPTN       | 56064  | neuroplastin                                          | -2.35 | -1.3 | 16 |
| EIF3M      | 295975 | eukaryotic translation initiation factor 3M           | -2.33 | -1.3 | 16 |
| RNF24      | 362218 | ring finger protein 24                                | -2.32 | -1.2 | 16 |
| TMEM204    | 287129 | transmembrane protein 204                             | -2.31 | -1.8 | 16 |
| NEGR1      | 59318  | neuronal growth regulator 1                           | -2.31 | -1.3 | 16 |
| ITGA1      | 25118  | integrin, alpha 1                                     | -2.31 | -1.5 | 16 |
| TYRO3      | 25232  | TYRO3 protein tyrosine kinase                         | -2.30 | -1.2 | 16 |
| LRRC16     | 306941 | leucine rich repeat containing 16Aprovided            | -2.30 | -1.4 | 16 |
| PRSS35     | 315866 | protease, serine, 35                                  | -2.30 | -3.2 | 16 |
| DOK1       | 312477 | docking protein 1                                     | -2.30 | -1.3 | 16 |
| CDH11      | 84407  | cadherin 11                                           | -2.30 | -1.7 | 16 |
| OAF        | 315594 | OAF homolog                                           | -2.30 | -1.4 | 16 |
| CFL2       | 366624 | cofilin 2                                             | -2.29 | -1.5 | 16 |
| WASF1      | 294568 | WAS protein family, member 1                          | -2.29 | -1.3 | 16 |
| GRSF1      | 305256 | G-rich RNA sequence binding factor 1                  | -2.29 | -1.2 | 16 |
| RBBP7      | 83712  | retinoblastoma binding protein 7                      | -2.29 | -1.5 | 16 |
| TCEAL8     | 367909 | transcription elongation factor A (SII)-like 8        | -2.29 | -1.2 | 16 |
| SPATS2     | 300221 | spermatogenesis associated, serine-rich 2             | -2.28 | -1.2 | 16 |
| DIS3L      | 363077 | DIS3 mitotic control homolog                          | -2.28 | -1.3 | 16 |
| MYL9       | 296313 | myosin, light chain 9                                 | -2.27 | -1.7 | 16 |
| LOC689176  | 689176 | similar to transmembrane protein                      | -2.27 | -1.4 | 16 |
| SPRYD3     | 315327 | SPRY domain containing 3                              | -2.27 | -1.2 | 16 |
| IRS1       | 25467  | insulin receptor substrate 1                          | -2.27 | -1.3 | 16 |
| SEPT9      | 83788  | septin 9                                              | -2.25 | -1.3 | 16 |
| NCF4       | 500904 | neutrophil cytosolic factor 4                         | -2.24 | -1.2 | 18 |
| NCK2       | 316369 | NCK adaptor protein 2                                 | -2.24 | -1.4 | 18 |
| RCN2       | 29218  | reticulocalbin 2                                      | -2.23 | -1.3 | 18 |
| RNF145     | 287212 | ring finger protein 145                               | -2.22 | -1.3 | 18 |
| TRIT1      | 362586 | tRNA isopentenyltransferase 1                         | -2.22 | -1.2 | 18 |
| NPY        | 24604  | neuropeptide Y                                        | -2.22 | -2.6 | 18 |
| MAGED2     | 113947 | melanoma antigen, family D, 2                         | -2.20 | -1.4 | 22 |
| DUSP18     | 305477 | dual specificity phosphatase 18                       | -2.19 | -1.3 | 22 |
| SLC25A48   | 361206 | solute carrier family 25, member 48                   | -2.19 | -1.2 | 22 |
| MYO7A      | 266714 | myosin VIIA                                           | -2.18 | -1.2 | 22 |
| FGF2       | 54250  | fibroblast growth factor 2                            | -2.17 | -1.6 | 22 |
| TTC39B     | 298186 | tetratricopeptide repeat domain 39B                   | -2.17 | -1.4 | 22 |
| HIRA       | 363849 | HIR histone cell cycle regulation defective homolog A | -2.16 | -1.3 | 22 |
| NID2       | 302248 | nidogen 2                                             | -2.16 | -2.3 | 22 |
| LOC366769  | 366769 | mCG1038839-like                                       | -2.16 | -1.1 | 22 |
| POSTN      | 361945 | periostin                                             | -2.16 | -1.8 | 22 |

<sup>1</sup>SAM (significance analysis of microarray) score = d(i); similar to t-test t-score

<sup>2</sup>Fold change NMO serum Tx vs CON serum Tx; generated by SAM

<sup>3</sup>SAM false discovery rate cut-off value as % = q; table is grouped by FDR≤0.05, FDR≤0.1, FDR≤0.22

Supplemental Table 3

| Individual Patient Data |                   |                    |         |      |       |
|-------------------------|-------------------|--------------------|---------|------|-------|
| ID# <sup>1</sup>        | Age               | Sex                | ID#     | Age  | Sex   |
| NMO 1                   | 43                | F                  | RRMS 1  | 54   | F     |
| NMO 2                   | 47                | F                  | RRMS 2  | 25   | F     |
| NMO 3                   | 44                | F                  | RRMS 3  | 38   | F     |
| NMO 4                   | 69                | F                  | RRMS 4  | 40   | F     |
| NMO 5                   | 48                | F                  | RRMS 5  | 52   | F     |
| NMO 6                   | 50                | F                  | RRMS 6  | 38   | M     |
| NMO 7                   | 61                | M                  | RRMS 7  | 46   | F     |
| NMO 8                   | 38                | F                  | RRMS 8  | 45   | F     |
| NMO 9                   | 51                | F                  | RRMS 9  | 46   | F     |
| NMO 10                  | 38                | F                  | RRMS 10 | 22   | F     |
| NMO 11                  | 37                | F                  |         | 41±7 | 90% F |
| NMO 12                  | 64                | F                  | SLE 1   | 65   | F     |
| NMO 13                  | 36                | F                  | SLE 2   | 65   | F     |
| NMO 14                  | 52                | F                  | SLE 3   | 68   | M     |
| NMO 15                  | 67                | F                  | SLE 4   | 70   | F     |
| NMO 16                  | 67                | M                  | SLE 5   | 29   | F     |
| NMO 17                  | 54                | F                  | SLE 6   | 58   | M     |
| NMO 18                  | 52                | F                  | SLE 7   | 43   | F     |
| NMO 19                  | 35                | F                  | SLE 8   | 71   | F     |
| NMO 20                  | 9                 | F                  | SLE 9   | 42   | F     |
|                         | 48±6 <sup>2</sup> | 90% F <sup>3</sup> | SLE 10  | 59   | F     |
| CON 1                   | 56                | F                  | SLE 11  | 35   | M     |
| CON 2                   | 54                | F                  | SLE 12  | 31   | F     |
| CON 3                   | 44                | F                  | SLE 13  | 36   | F     |
| CON 4                   | 59                | F                  | SLE 14  | 55   | M     |
| CON 5                   | 59                | M                  | SLE 15  | 41   | F     |
| CON 6                   | 65                | F                  | SLE 16  | 50   | F     |
| CON 7                   | 34                | F                  | SLE 17  | 27   | F     |
| CON 8                   | 28                | F                  | SLE 18  | 51   | M     |
| CON 9                   | 73                | F                  |         | 50±7 | 72% F |
| CON 10                  | 38                | F                  |         |      |       |
|                         | 51±9              | 90% F              |         |      |       |

<sup>1</sup>Patient group: NMO = NMO patients; CON = control samples; RRMS = relapsing-remitting multiple sclerosis patients; SLE = Sjögren or systemic lupus erythematosus.

<sup>2</sup>Mean age ± 95% confidence interval.  $F(3,54)=1.233$ ,  $P=0.307$  between all groups by one-way ANOVA.

<sup>3</sup>Percent female.  $H(20,10,10,18)=2.941$ ,  $P=0.401$  between all groups by one-way ANOVA on ranks.

Supplemental Table 4

| Comparison <sup>a</sup>     | q      | P      |                             |        |        |
|-----------------------------|--------|--------|-----------------------------|--------|--------|
| NMO pool #1 vs. SLE17       | 49.971 | <0.001 | NMO pool # vs. NMO pool #   | 0.097  | 0.945  |
| NMO pool #1 vs. SLE16       | 49.966 | <0.001 | NMO pool #2 vs. SLE17       | 49.874 | <0.001 |
| NMO pool #1 vs. CON pool #2 | 49.946 | <0.001 | NMO pool #2 vs. SLE16       | 49.869 | <0.001 |
| NMO pool #1 vs. SLE18       | 49.945 | <0.001 | NMO pool #2 vs. CON pool #2 | 49.849 | <0.001 |
| NMO pool #1 vs. SLE9        | 49.943 | <0.001 | NMO pool #2 vs. SLE18       | 49.848 | <0.001 |
| NMO pool #1 vs. SLE6        | 49.939 | <0.001 | NMO pool #2 vs. SLE9        | 49.846 | <0.001 |
| NMO pool #1 vs. SLE5        | 49.938 | <0.001 | NMO pool #2 vs. SLE6        | 49.842 | <0.001 |
| NMO pool #1 vs. SLE3        | 49.933 | <0.001 | NMO pool #2 vs. SLE5        | 49.841 | <0.001 |
| NMO pool #1 vs. SLE10       | 49.932 | <0.001 | NMO pool #2 vs. SLE3        | 49.836 | <0.001 |
| NMO pool #1 vs. CON pool #1 | 49.931 | <0.001 | NMO pool #2 vs. SLE10       | 49.835 | <0.001 |
| NMO pool #1 vs. SLE15       | 49.925 | <0.001 | NMO pool #2 vs. CON pool #1 | 49.834 | <0.001 |
| NMO pool #1 vs. RRMS pool   | 49.92  | <0.001 | NMO pool #2 vs. SLE15       | 49.828 | <0.001 |
| NMO pool #1 vs. SLE2        | 49.918 | <0.001 | NMO pool #2 vs. RRMS pool   | 49.823 | <0.001 |
| NMO pool #1 vs. SLE7        | 49.915 | <0.001 | NMO pool #2 vs. SLE2        | 49.821 | <0.001 |
| NMO pool #1 vs. MS4         | 49.91  | <0.001 | NMO pool #2 vs. SLE7        | 49.818 | <0.001 |
| NMO pool #1 vs. CON2        | 49.91  | <0.001 | NMO pool #2 vs. MS4         | 49.813 | <0.001 |
| NMO pool #1 vs. SLE13       | 49.909 | <0.001 | NMO pool #2 vs. CON2        | 49.813 | <0.001 |
| NMO pool #1 vs. SLE12       | 49.907 | <0.001 | NMO pool #2 vs. SLE13       | 49.812 | <0.001 |
| NMO pool #1 vs. NMO20       | 49.907 | <0.001 | NMO pool #2 vs. SLE12       | 49.81  | <0.001 |
| NMO pool #1 vs. SLE14       | 49.903 | <0.001 | NMO pool #2 vs. NMO20       | 49.81  | <0.001 |
| NMO pool #1 vs. CON3        | 49.903 | <0.001 | NMO pool #2 vs. SLE14       | 49.806 | <0.001 |
| NMO pool #1 vs. NMO15       | 49.903 | <0.001 | NMO pool #2 vs. CON3        | 49.806 | <0.001 |
| NMO pool #1 vs. CON pool #1 | 49.899 | <0.001 | NMO pool #2 vs. NMO15       | 49.806 | <0.001 |
| NMO pool #1 vs. CON8        | 49.898 | <0.001 | NMO pool #2 vs. CON pool #1 | 49.802 | <0.001 |
| NMO pool #1 vs. NMO13       | 49.898 | <0.001 | NMO pool #2 vs. CON8        | 49.801 | <0.001 |
| NMO pool #1 vs. MS2         | 49.897 | <0.001 | NMO pool #2 vs. NMO13       | 49.801 | <0.001 |
| NMO pool #1 vs. MS6         | 49.897 | <0.001 | NMO pool #2 vs. MS2         | 49.801 | <0.001 |
| NMO pool #1 vs. NMO12       | 49.897 | <0.001 | NMO pool #2 vs. MS6         | 49.8   | <0.001 |
| NMO pool #1 vs. NMO10       | 49.896 | <0.001 | NMO pool #2 vs. NMO12       | 49.8   | <0.001 |
| NMO pool #1 vs. NMO4        | 49.892 | <0.001 | NMO pool #2 vs. NMO10       | 49.799 | <0.001 |
| NMO pool #1 vs. NMO19       | 49.892 | <0.001 | NMO pool #2 vs. NMO4        | 49.795 | <0.001 |
| NMO pool #1 vs. NMO11       | 49.891 | <0.001 | NMO pool #2 vs. NMO19       | 49.795 | <0.001 |
| NMO pool #1 vs. NMO16       | 49.89  | <0.001 | NMO pool #2 vs. NMO11       | 49.794 | <0.001 |
| NMO pool #1 vs. SLE4        | 49.889 | <0.001 | NMO pool #2 vs. NMO16       | 49.793 | <0.001 |
| NMO pool #1 vs. MS5         | 49.888 | <0.001 | NMO pool #2 vs. SLE4        | 49.792 | <0.001 |
| NMO pool #1 vs. MS10        | 49.884 | <0.001 | NMO pool #2 vs. MS5         | 49.791 | <0.001 |
| NMO pool #1 vs. CON6        | 49.884 | <0.001 | NMO pool #2 vs. MS10        | 49.787 | <0.001 |
| NMO pool #1 vs. CON7        | 49.884 | <0.001 | NMO pool #2 vs. CON6        | 49.787 | <0.001 |
| NMO pool #1 vs. MS1         | 49.88  | <0.001 | NMO pool #2 vs. CON7        | 49.787 | <0.001 |
| NMO pool #1 vs. CON5        | 49.88  | <0.001 | NMO pool #2 vs. MS1         | 49.783 | <0.001 |
| NMO pool #1 vs. NMO17       | 49.878 | <0.001 | NMO pool #2 vs. CON5        | 49.783 | <0.001 |
| NMO pool #1 vs. CON1        | 49.878 | <0.001 | NMO pool #2 vs. NMO17       | 49.781 | <0.001 |
| NMO pool #1 vs. NMO9        | 49.876 | <0.001 | NMO pool #2 vs. CON1        | 49.781 | <0.001 |
| NMO pool #1 vs. CON10       | 49.873 | <0.001 | NMO pool #2 vs. NMO9        | 49.779 | <0.001 |
| NMO pool #1 vs. CON4        | 49.87  | <0.001 | NMO pool #2 vs. CON10       | 49.776 | <0.001 |
| NMO pool #1 vs. SLE11       | 49.868 | <0.001 | NMO pool #2 vs. CON4        | 49.773 | <0.001 |
| NMO pool #1 vs. SLE pool    | 49.864 | <0.001 | NMO pool #2 vs. SLE11       | 49.771 | <0.001 |
| NMO pool #1 vs. CON9        | 49.862 | <0.001 | NMO pool #2 vs. SLE pool    | 49.767 | <0.001 |
| NMO pool #1 vs. MS7         | 49.86  | <0.001 | NMO pool #2 vs. CON9        | 49.765 | <0.001 |
| NMO pool #1 vs. NMO1        | 49.858 | <0.001 | NMO pool #2 vs. MS7         | 49.763 | <0.001 |
| NMO pool #1 vs. MS9         | 49.843 | <0.001 | NMO pool #2 vs. NMO1        | 49.761 | <0.001 |
| NMO pool #1 vs. MS8         | 49.836 | <0.001 | NMO pool #2 vs. MS9         | 49.746 | <0.001 |
| NMO pool #1 vs. MS3         | 49.819 | <0.001 | NMO pool #2 vs. MS8         | 49.739 | <0.001 |
| NMO pool #1 vs. SLE8        | 49.813 | <0.001 | NMO pool #2 vs. MS3         | 49.722 | <0.001 |
| NMO pool #1 vs. SLE1        | 49.541 | <0.001 | NMO pool #2 vs. SLE8        | 49.716 | <0.001 |
| NMO pool #1 vs. NMO2        | 39.752 | <0.001 | NMO pool #2 vs. SLE1        | 49.444 | <0.001 |
| NMO pool #1 vs. NMO6        | 38.67  | <0.001 | NMO pool #2 vs. NMO2        | 39.655 | <0.001 |
| NMO pool #1 vs. NMO18       | 36.417 | <0.001 | NMO pool #2 vs. NMO6        | 38.573 | <0.001 |
| NMO pool #1 vs. NMO14       | 31.943 | <0.001 | NMO pool #2 vs. NMO18       | 36.32  | <0.001 |
| NMO pool #1 vs. NMO3        | 19.032 | <0.001 | NMO pool #2 vs. NMO14       | 31.846 | <0.001 |
| NMO pool #1 vs. NMO7        | 18.163 | <0.001 | NMO pool #2 vs. NMO3        | 18.935 | <0.001 |
| NMO pool #1 vs. NMO5        | 14.094 | <0.001 | NMO pool #2 vs. NMO7        | 18.066 | <0.001 |
| NMO pool # vs. NMO pool #   | 10.274 | <0.001 | NMO pool #2 vs. NMO5        | 13.997 | <0.001 |
| NMO pool #1 vs. NMO8        | 6.76   | <0.001 | NMO pool # vs. NMO pool #   | 10.177 | <0.001 |
|                             |        |        | NMO pool #2 vs. NMO8        | 6.663  | <0.001 |

|                             |        |        |
|-----------------------------|--------|--------|
| NMO8 vs. SLE17              | 43.21  | <0.001 |
| NMO8 vs. SLE16              | 43.205 | <0.001 |
| NMO8 vs. CON pool #2        | 43.186 | <0.001 |
| NMO8 vs. SLE18              | 43.184 | <0.001 |
| NMO8 vs. SLE9               | 43.182 | <0.001 |
| NMO8 vs. SLE6               | 43.179 | <0.001 |
| NMO8 vs. SLE5               | 43.178 | <0.001 |
| NMO8 vs. SLE3               | 43.172 | <0.001 |
| NMO8 vs. SLE10              | 43.171 | <0.001 |
| NMO8 vs. CON pool #1        | 43.17  | <0.001 |
| NMO8 vs. SLE15              | 43.165 | <0.001 |
| NMO8 vs. RRMS pool          | 43.159 | <0.001 |
| NMO8 vs. SLE2               | 43.158 | <0.001 |
| NMO8 vs. SLE7               | 43.155 | <0.001 |
| NMO8 vs. MS4                | 43.15  | <0.001 |
| NMO8 vs. CON2               | 43.15  | <0.001 |
| NMO8 vs. SLE13              | 43.148 | <0.001 |
| NMO8 vs. SLE12              | 43.147 | <0.001 |
| NMO8 vs. NMO20              | 43.146 | <0.001 |
| NMO8 vs. SLE14              | 43.142 | <0.001 |
| NMO8 vs. CON3               | 43.142 | <0.001 |
| NMO8 vs. NMO15              | 43.142 | <0.001 |
| NMO8 vs. CON pool #1        | 43.139 | <0.001 |
| NMO8 vs. CON8               | 43.138 | <0.001 |
| NMO8 vs. NMO13              | 43.138 | <0.001 |
| NMO8 vs. MS2                | 43.137 | <0.001 |
| NMO8 vs. MS6                | 43.137 | <0.001 |
| NMO8 vs. NMO12              | 43.137 | <0.001 |
| NMO8 vs. NMO10              | 43.135 | <0.001 |
| NMO8 vs. NMO4               | 43.132 | <0.001 |
| NMO8 vs. NMO19              | 43.132 | <0.001 |
| NMO8 vs. NMO11              | 43.131 | <0.001 |
| NMO8 vs. NMO16              | 43.129 | <0.001 |
| NMO8 vs. SLE4               | 43.129 | <0.001 |
| NMO8 vs. MS5                | 43.128 | <0.001 |
| NMO8 vs. MS10               | 43.124 | <0.001 |
| NMO8 vs. CON6               | 43.123 | <0.001 |
| NMO8 vs. CON7               | 43.123 | <0.001 |
| NMO8 vs. MS1                | 43.12  | <0.001 |
| NMO8 vs. CON5               | 43.119 | <0.001 |
| NMO8 vs. NMO17              | 43.117 | <0.001 |
| NMO8 vs. CON1               | 43.117 | <0.001 |
| NMO8 vs. NMO9               | 43.115 | <0.001 |
| NMO8 vs. CON10              | 43.113 | <0.001 |
| NMO8 vs. CON4               | 43.109 | <0.001 |
| NMO8 vs. SLE11              | 43.108 | <0.001 |
| NMO8 vs. SLE pool           | 43.103 | <0.001 |
| NMO8 vs. CON9               | 43.102 | <0.001 |
| NMO8 vs. MS7                | 43.099 | <0.001 |
| NMO8 vs. NMO1               | 43.098 | <0.001 |
| NMO8 vs. MS9                | 43.082 | <0.001 |
| NMO8 vs. MS8                | 43.075 | <0.001 |
| NMO8 vs. MS3                | 43.058 | <0.001 |
| NMO8 vs. SLE8               | 43.053 | <0.001 |
| NMO8 vs. SLE1               | 42.781 | <0.001 |
| NMO8 vs. NMO2               | 32.992 | <0.001 |
| NMO8 vs. NMO6               | 31.91  | <0.001 |
| NMO8 vs. NMO18              | 29.656 | <0.001 |
| NMO8 vs. NMO14              | 25.182 | <0.001 |
| NMO8 vs. NMO3               | 12.271 | <0.001 |
| NMO8 vs. NMO7               | 11.403 | <0.001 |
| NMO8 vs. NMO5               | 7.334  | <0.001 |
| NMO8 vs. NMO pool #3        | 3.514  | 0.013  |
| NMO pool #3 vs. SLE17       | 39.696 | <0.001 |
| NMO pool #3 vs. SLE16       | 39.691 | <0.001 |
| NMO pool #3 vs. CON pool #2 | 39.672 | <0.001 |

|                             |        |        |
|-----------------------------|--------|--------|
| NMO pool #3 vs. SLE18       | 39.671 | <0.001 |
| NMO pool #3 vs. SLE9        | 39.668 | <0.001 |
| NMO pool #3 vs. SLE6        | 39.665 | <0.001 |
| NMO pool #3 vs. SLE5        | 39.664 | <0.001 |
| NMO pool #3 vs. SLE3        | 39.659 | <0.001 |
| NMO pool #3 vs. SLE10       | 39.657 | <0.001 |
| NMO pool #3 vs. CON pool #1 | 39.656 | <0.001 |
| NMO pool #3 vs. SLE15       | 39.651 | <0.001 |
| NMO pool #3 vs. RRMS pool   | 39.645 | <0.001 |
| NMO pool #3 vs. SLE2        | 39.644 | <0.001 |
| NMO pool #3 vs. SLE7        | 39.641 | <0.001 |
| NMO pool #3 vs. MS4         | 39.636 | <0.001 |
| NMO pool #3 vs. CON2        | 39.636 | <0.001 |
| NMO pool #3 vs. SLE13       | 39.634 | <0.001 |
| NMO pool #3 vs. SLE12       | 39.633 | <0.001 |
| NMO pool #3 vs. NMO20       | 39.633 | <0.001 |
| NMO pool #3 vs. SLE14       | 39.628 | <0.001 |
| NMO pool #3 vs. CON3        | 39.628 | <0.001 |
| NMO pool #3 vs. NMO15       | 39.628 | <0.001 |
| NMO pool #3 vs. CON pool #1 | 39.625 | <0.001 |
| NMO pool #3 vs. CON8        | 39.624 | <0.001 |
| NMO pool #3 vs. NMO13       | 39.624 | <0.001 |
| NMO pool #3 vs. MS2         | 39.623 | <0.001 |
| NMO pool #3 vs. MS6         | 39.623 | <0.001 |
| NMO pool #3 vs. NMO12       | 39.623 | <0.001 |
| NMO pool #3 vs. NMO10       | 39.622 | <0.001 |
| NMO pool #3 vs. NMO4        | 39.618 | <0.001 |
| NMO pool #3 vs. NMO19       | 39.618 | <0.001 |
| NMO pool #3 vs. NMO11       | 39.617 | <0.001 |
| NMO pool #3 vs. NMO16       | 39.616 | <0.001 |
| NMO pool #3 vs. SLE4        | 39.615 | <0.001 |
| NMO pool #3 vs. MS5         | 39.614 | <0.001 |
| NMO pool #3 vs. MS10        | 39.61  | <0.001 |
| NMO pool #3 vs. CON6        | 39.609 | <0.001 |
| NMO pool #3 vs. CON7        | 39.609 | <0.001 |
| NMO pool #3 vs. MS1         | 39.606 | <0.001 |
| NMO pool #3 vs. CON5        | 39.606 | <0.001 |
| NMO pool #3 vs. NMO17       | 39.604 | <0.001 |
| NMO pool #3 vs. CON1        | 39.603 | <0.001 |
| NMO pool #3 vs. NMO9        | 39.602 | <0.001 |
| NMO pool #3 vs. CON10       | 39.599 | <0.001 |
| NMO pool #3 vs. CON4        | 39.596 | <0.001 |
| NMO pool #3 vs. SLE11       | 39.594 | <0.001 |
| NMO pool #3 vs. SLE pool    | 39.589 | <0.001 |
| NMO pool #3 vs. CON9        | 39.588 | <0.001 |
| NMO pool #3 vs. MS7         | 39.586 | <0.001 |
| NMO pool #3 vs. NMO1        | 39.584 | <0.001 |
| NMO pool #3 vs. MS9         | 39.568 | <0.001 |
| NMO pool #3 vs. MS8         | 39.561 | <0.001 |
| NMO pool #3 vs. MS3         | 39.544 | <0.001 |
| NMO pool #3 vs. SLE8        | 39.539 | <0.001 |
| NMO pool #3 vs. SLE1        | 39.267 | <0.001 |
| NMO pool #3 vs. NMO2        | 29.478 | <0.001 |
| NMO pool #3 vs. NMO6        | 28.396 | <0.001 |
| NMO pool #3 vs. NMO18       | 26.142 | <0.001 |
| NMO pool #3 vs. NMO14       | 21.668 | <0.001 |
| NMO pool #3 vs. NMO3        | 8.757  | <0.001 |
| NMO pool #3 vs. NMO7        | 7.889  | <0.001 |
| NMO pool #3 vs. NMO5        | 3.82   | 0.007  |
| NMO5 vs. SLE17              | 35.876 | <0.001 |
| NMO5 vs. SLE16              | 35.871 | <0.001 |
| NMO5 vs. CON pool #2        | 35.852 | <0.001 |
| NMO5 vs. SLE18              | 35.851 | <0.001 |
| NMO5 vs. SLE9               | 35.848 | <0.001 |
| NMO5 vs. SLE6               | 35.845 | <0.001 |
| NMO5 vs. SLE5               | 35.844 | <0.001 |

|                      |        |        |
|----------------------|--------|--------|
| NMO5 vs. SLE3        | 35.839 | <0.001 |
| NMO5 vs. SLE10       | 35.837 | <0.001 |
| NMO5 vs. CON pool #1 | 35.836 | <0.001 |
| NMO5 vs. SLE15       | 35.831 | <0.001 |
| NMO5 vs. RRMS pool   | 35.825 | <0.001 |
| NMO5 vs. SLE2        | 35.824 | <0.001 |
| NMO5 vs. SLE7        | 35.821 | <0.001 |
| NMO5 vs. MS4         | 35.816 | <0.001 |
| NMO5 vs. CON2        | 35.816 | <0.001 |
| NMO5 vs. SLE13       | 35.814 | <0.001 |
| NMO5 vs. SLE12       | 35.813 | <0.001 |
| NMO5 vs. NMO20       | 35.813 | <0.001 |
| NMO5 vs. SLE14       | 35.808 | <0.001 |
| NMO5 vs. CON3        | 35.808 | <0.001 |
| NMO5 vs. NMO15       | 35.808 | <0.001 |
| NMO5 vs. CON pool #1 | 35.805 | <0.001 |
| NMO5 vs. CON8        | 35.804 | <0.001 |
| NMO5 vs. NMO13       | 35.804 | <0.001 |
| NMO5 vs. MS2         | 35.803 | <0.001 |
| NMO5 vs. MS6         | 35.803 | <0.001 |
| NMO5 vs. NMO12       | 35.803 | <0.001 |
| NMO5 vs. NMO10       | 35.802 | <0.001 |
| NMO5 vs. NMO4        | 35.798 | <0.001 |
| NMO5 vs. NMO19       | 35.798 | <0.001 |
| NMO5 vs. NMO11       | 35.797 | <0.001 |
| NMO5 vs. NMO16       | 35.795 | <0.001 |
| NMO5 vs. SLE4        | 35.795 | <0.001 |
| NMO5 vs. MS5         | 35.794 | <0.001 |
| NMO5 vs. MS10        | 35.79  | <0.001 |
| NMO5 vs. CON6        | 35.789 | <0.001 |
| NMO5 vs. CON7        | 35.789 | <0.001 |
| NMO5 vs. MS1         | 35.786 | <0.001 |
| NMO5 vs. CON5        | 35.786 | <0.001 |
| NMO5 vs. NMO17       | 35.784 | <0.001 |
| NMO5 vs. CON1        | 35.783 | <0.001 |
| NMO5 vs. NMO9        | 35.782 | <0.001 |
| NMO5 vs. CON10       | 35.779 | <0.001 |
| NMO5 vs. CON4        | 35.776 | <0.001 |
| NMO5 vs. SLE11       | 35.774 | <0.001 |
| NMO5 vs. SLE pool    | 35.769 | <0.001 |
| NMO5 vs. CON9        | 35.768 | <0.001 |
| NMO5 vs. MS7         | 35.766 | <0.001 |
| NMO5 vs. NMO1        | 35.764 | <0.001 |
| NMO5 vs. MS9         | 35.748 | <0.001 |
| NMO5 vs. MS8         | 35.741 | <0.001 |
| NMO5 vs. MS3         | 35.724 | <0.001 |
| NMO5 vs. SLE8        | 35.719 | <0.001 |
| NMO5 vs. SLE1        | 35.447 | <0.001 |
| NMO5 vs. NMO2        | 25.658 | <0.001 |
| NMO5 vs. NMO6        | 24.576 | <0.001 |
| NMO5 vs. NMO18       | 22.322 | <0.001 |
| NMO5 vs. NMO14       | 17.848 | <0.001 |
| NMO5 vs. NMO3        | 4.937  | 0.001  |
| NMO5 vs. NMO7        | 4.069  | 0.004  |
| NMO7 vs. SLE17       | 31.807 | <0.001 |
| NMO7 vs. SLE16       | 31.802 | <0.001 |
| NMO7 vs. CON pool #2 | 31.783 | <0.001 |
| NMO7 vs. SLE18       | 31.781 | <0.001 |
| NMO7 vs. SLE9        | 31.779 | <0.001 |
| NMO7 vs. SLE6        | 31.776 | <0.001 |
| NMO7 vs. SLE5        | 31.775 | <0.001 |
| NMO7 vs. SLE3        | 31.769 | <0.001 |
| NMO7 vs. SLE10       | 31.768 | <0.001 |
| NMO7 vs. CON pool #1 | 31.767 | <0.001 |
| NMO7 vs. SLE15       | 31.762 | <0.001 |
| NMO7 vs. RRMS pool   | 31.756 | <0.001 |

|                      |        |        |
|----------------------|--------|--------|
| NMO7 vs. SLE2        | 31.755 | <0.001 |
| NMO7 vs. SLE7        | 31.752 | <0.001 |
| NMO7 vs. MS4         | 31.747 | <0.001 |
| NMO7 vs. CON2        | 31.747 | <0.001 |
| NMO7 vs. SLE13       | 31.745 | <0.001 |
| NMO7 vs. SLE12       | 31.744 | <0.001 |
| NMO7 vs. NMO20       | 31.743 | <0.001 |
| NMO7 vs. SLE14       | 31.739 | <0.001 |
| NMO7 vs. CON3        | 31.739 | <0.001 |
| NMO7 vs. NMO15       | 31.739 | <0.001 |
| NMO7 vs. CON pool #1 | 31.736 | <0.001 |
| NMO7 vs. CON8        | 31.735 | <0.001 |
| NMO7 vs. NMO13       | 31.735 | <0.001 |
| NMO7 vs. MS2         | 31.734 | <0.001 |
| NMO7 vs. MS6         | 31.734 | <0.001 |
| NMO7 vs. NMO12       | 31.734 | <0.001 |
| NMO7 vs. NMO10       | 31.732 | <0.001 |
| NMO7 vs. NMO4        | 31.729 | <0.001 |
| NMO7 vs. NMO19       | 31.729 | <0.001 |
| NMO7 vs. NMO11       | 31.728 | <0.001 |
| NMO7 vs. NMO16       | 31.726 | <0.001 |
| NMO7 vs. SLE4        | 31.726 | <0.001 |
| NMO7 vs. MS5         | 31.725 | <0.001 |
| NMO7 vs. MS10        | 31.721 | <0.001 |
| NMO7 vs. CON6        | 31.72  | <0.001 |
| NMO7 vs. CON7        | 31.72  | <0.001 |
| NMO7 vs. MS1         | 31.717 | <0.001 |
| NMO7 vs. CON5        | 31.716 | <0.001 |
| NMO7 vs. NMO17       | 31.714 | <0.001 |
| NMO7 vs. CON1        | 31.714 | <0.001 |
| NMO7 vs. NMO9        | 31.712 | <0.001 |
| NMO7 vs. CON10       | 31.71  | <0.001 |
| NMO7 vs. CON4        | 31.706 | <0.001 |
| NMO7 vs. SLE11       | 31.705 | <0.001 |
| NMO7 vs. SLE pool    | 31.7   | <0.001 |
| NMO7 vs. CON9        | 31.699 | <0.001 |
| NMO7 vs. MS7         | 31.696 | <0.001 |
| NMO7 vs. NMO1        | 31.695 | <0.001 |
| NMO7 vs. MS9         | 31.679 | <0.001 |
| NMO7 vs. MS8         | 31.672 | <0.001 |
| NMO7 vs. MS3         | 31.655 | <0.001 |
| NMO7 vs. SLE8        | 31.65  | <0.001 |
| NMO7 vs. SLE1        | 31.378 | <0.001 |
| NMO7 vs. NMO2        | 21.589 | <0.001 |
| NMO7 vs. NMO6        | 20.507 | <0.001 |
| NMO7 vs. NMO18       | 18.253 | <0.001 |
| NMO7 vs. NMO14       | 13.779 | <0.001 |
| NMO7 vs. NMO3        | 0.868  | 0.539  |
| NMO3 vs. SLE17       | 30.939 | <0.001 |
| NMO3 vs. SLE16       | 30.934 | <0.001 |
| NMO3 vs. CON pool #2 | 30.914 | <0.001 |
| NMO3 vs. SLE18       | 30.913 | <0.001 |
| NMO3 vs. SLE9        | 30.911 | <0.001 |
| NMO3 vs. SLE6        | 30.908 | <0.001 |
| NMO3 vs. SLE5        | 30.906 | <0.001 |
| NMO3 vs. SLE3        | 30.901 | <0.001 |
| NMO3 vs. SLE10       | 30.9   | <0.001 |
| NMO3 vs. CON pool #1 | 30.899 | <0.001 |
| NMO3 vs. SLE15       | 30.894 | <0.001 |
| NMO3 vs. RRMS pool   | 30.888 | <0.001 |
| NMO3 vs. SLE2        | 30.887 | <0.001 |
| NMO3 vs. SLE7        | 30.884 | <0.001 |
| NMO3 vs. MS4         | 30.879 | <0.001 |
| NMO3 vs. CON2        | 30.878 | <0.001 |
| NMO3 vs. SLE13       | 30.877 | <0.001 |
| NMO3 vs. SLE12       | 30.876 | <0.001 |

|                       |        |        |
|-----------------------|--------|--------|
| NMO3 vs. NMO20        | 30.875 | <0.001 |
| NMO3 vs. SLE14        | 30.871 | <0.001 |
| NMO3 vs. CON3         | 30.871 | <0.001 |
| NMO3 vs. NMO15        | 30.871 | <0.001 |
| NMO3 vs. CON pool #1  | 30.867 | <0.001 |
| NMO3 vs. CON8         | 30.867 | <0.001 |
| NMO3 vs. NMO13        | 30.866 | <0.001 |
| NMO3 vs. MS2          | 30.866 | <0.001 |
| NMO3 vs. MS6          | 30.865 | <0.001 |
| NMO3 vs. NMO12        | 30.865 | <0.001 |
| NMO3 vs. NMO10        | 30.864 | <0.001 |
| NMO3 vs. NMO4         | 30.861 | <0.001 |
| NMO3 vs. NMO19        | 30.86  | <0.001 |
| NMO3 vs. NMO11        | 30.859 | <0.001 |
| NMO3 vs. NMO16        | 30.858 | <0.001 |
| NMO3 vs. SLE4         | 30.858 | <0.001 |
| NMO3 vs. MS5          | 30.857 | <0.001 |
| NMO3 vs. MS10         | 30.853 | <0.001 |
| NMO3 vs. CON6         | 30.852 | <0.001 |
| NMO3 vs. CON7         | 30.852 | <0.001 |
| NMO3 vs. MS1          | 30.849 | <0.001 |
| NMO3 vs. CON5         | 30.848 | <0.001 |
| NMO3 vs. NMO17        | 30.846 | <0.001 |
| NMO3 vs. CON1         | 30.846 | <0.001 |
| NMO3 vs. NMO9         | 30.844 | <0.001 |
| NMO3 vs. CON10        | 30.842 | <0.001 |
| NMO3 vs. CON4         | 30.838 | <0.001 |
| NMO3 vs. SLE11        | 30.837 | <0.001 |
| NMO3 vs. SLE pool     | 30.832 | <0.001 |
| NMO3 vs. CON9         | 30.831 | <0.001 |
| NMO3 vs. MS7          | 30.828 | <0.001 |
| NMO3 vs. NMO1         | 30.827 | <0.001 |
| NMO3 vs. MS9          | 30.811 | <0.001 |
| NMO3 vs. MS8          | 30.804 | <0.001 |
| NMO3 vs. MS3          | 30.787 | <0.001 |
| NMO3 vs. SLE8         | 30.782 | <0.001 |
| NMO3 vs. SLE1         | 30.51  | <0.001 |
| NMO3 vs. NMO2         | 20.721 | <0.001 |
| NMO3 vs. NMO6         | 19.638 | <0.001 |
| NMO3 vs. NMO18        | 17.385 | <0.001 |
| NMO3 vs. NMO14        | 12.911 | <0.001 |
| NMO14 vs. SLE17       | 18.028 | <0.001 |
| NMO14 vs. SLE16       | 18.023 | <0.001 |
| NMO14 vs. CON pool #2 | 18.003 | <0.001 |
| NMO14 vs. SLE18       | 18.002 | <0.001 |
| NMO14 vs. SLE9        | 18     | <0.001 |
| NMO14 vs. SLE6        | 17.997 | <0.001 |
| NMO14 vs. SLE5        | 17.995 | <0.001 |
| NMO14 vs. SLE3        | 17.99  | <0.001 |
| NMO14 vs. SLE10       | 17.989 | <0.001 |
| NMO14 vs. CON pool #1 | 17.988 | <0.001 |
| NMO14 vs. SLE15       | 17.983 | <0.001 |
| NMO14 vs. RRMS pool   | 17.977 | <0.001 |
| NMO14 vs. SLE2        | 17.976 | <0.001 |
| NMO14 vs. SLE7        | 17.973 | <0.001 |
| NMO14 vs. MS4         | 17.968 | <0.001 |
| NMO14 vs. CON2        | 17.967 | <0.001 |
| NMO14 vs. SLE13       | 17.966 | <0.001 |
| NMO14 vs. SLE12       | 17.965 | <0.001 |
| NMO14 vs. NMO20       | 17.964 | <0.001 |
| NMO14 vs. SLE14       | 17.96  | <0.001 |
| NMO14 vs. CON3        | 17.96  | <0.001 |
| NMO14 vs. NMO15       | 17.96  | <0.001 |
| NMO14 vs. CON pool #1 | 17.957 | <0.001 |
| NMO14 vs. CON8        | 17.956 | <0.001 |
| NMO14 vs. NMO13       | 17.955 | <0.001 |

|                       |        |        |
|-----------------------|--------|--------|
| NMO14 vs. MS2         | 17.955 | <0.001 |
| NMO14 vs. MS6         | 17.955 | <0.001 |
| NMO14 vs. NMO12       | 17.954 | <0.001 |
| NMO14 vs. NMO10       | 17.953 | <0.001 |
| NMO14 vs. NMO4        | 17.95  | <0.001 |
| NMO14 vs. NMO19       | 17.949 | <0.001 |
| NMO14 vs. NMO11       | 17.948 | <0.001 |
| NMO14 vs. NMO16       | 17.947 | <0.001 |
| NMO14 vs. SLE4        | 17.947 | <0.001 |
| NMO14 vs. MS5         | 17.946 | <0.001 |
| NMO14 vs. MS10        | 17.942 | <0.001 |
| NMO14 vs. CON6        | 17.941 | <0.001 |
| NMO14 vs. CON7        | 17.941 | <0.001 |
| NMO14 vs. MS1         | 17.938 | <0.001 |
| NMO14 vs. CON5        | 17.937 | <0.001 |
| NMO14 vs. NMO17       | 17.935 | <0.001 |
| NMO14 vs. CON1        | 17.935 | <0.001 |
| NMO14 vs. NMO9        | 17.933 | <0.001 |
| NMO14 vs. CON10       | 17.931 | <0.001 |
| NMO14 vs. CON4        | 17.927 | <0.001 |
| NMO14 vs. SLE11       | 17.926 | <0.001 |
| NMO14 vs. SLE pool    | 17.921 | <0.001 |
| NMO14 vs. CON9        | 17.92  | <0.001 |
| NMO14 vs. MS7         | 17.917 | <0.001 |
| NMO14 vs. NMO1        | 17.916 | <0.001 |
| NMO14 vs. MS9         | 17.9   | <0.001 |
| NMO14 vs. MS8         | 17.893 | <0.001 |
| NMO14 vs. MS3         | 17.876 | <0.001 |
| NMO14 vs. SLE8        | 17.871 | <0.001 |
| NMO14 vs. SLE1        | 17.599 | <0.001 |
| NMO14 vs. NMO2        | 7.81   | <0.001 |
| NMO14 vs. NMO6        | 6.727  | <0.001 |
| NMO14 vs. NMO18       | 4.474  | 0.002  |
| NMO18 vs. SLE17       | 13.554 | <0.001 |
| NMO18 vs. SLE16       | 13.549 | <0.001 |
| NMO18 vs. CON pool #2 | 13.529 | <0.001 |
| NMO18 vs. SLE18       | 13.528 | <0.001 |
| NMO18 vs. SLE9        | 13.526 | <0.001 |
| NMO18 vs. SLE6        | 13.522 | <0.001 |
| NMO18 vs. SLE5        | 13.521 | <0.001 |
| NMO18 vs. SLE3        | 13.516 | <0.001 |
| NMO18 vs. SLE10       | 13.515 | <0.001 |
| NMO18 vs. CON pool #1 | 13.514 | <0.001 |
| NMO18 vs. SLE15       | 13.509 | <0.001 |
| NMO18 vs. RRMS pool   | 13.503 | <0.001 |
| NMO18 vs. SLE2        | 13.502 | <0.001 |
| NMO18 vs. SLE7        | 13.499 | <0.001 |
| NMO18 vs. MS4         | 13.494 | <0.001 |
| NMO18 vs. CON2        | 13.493 | <0.001 |
| NMO18 vs. SLE13       | 13.492 | <0.001 |
| NMO18 vs. SLE12       | 13.491 | <0.001 |
| NMO18 vs. NMO20       | 13.49  | <0.001 |
| NMO18 vs. SLE14       | 13.486 | <0.001 |
| NMO18 vs. CON3        | 13.486 | <0.001 |
| NMO18 vs. NMO15       | 13.486 | <0.001 |
| NMO18 vs. CON pool #1 | 13.482 | <0.001 |
| NMO18 vs. CON8        | 13.481 | <0.001 |
| NMO18 vs. NMO13       | 13.481 | <0.001 |
| NMO18 vs. MS2         | 13.481 | <0.001 |
| NMO18 vs. MS6         | 13.48  | <0.001 |
| NMO18 vs. NMO12       | 13.48  | <0.001 |
| NMO18 vs. NMO10       | 13.479 | <0.001 |
| NMO18 vs. NMO4        | 13.475 | <0.001 |
| NMO18 vs. NMO19       | 13.475 | <0.001 |
| NMO18 vs. NMO11       | 13.474 | <0.001 |
| NMO18 vs. NMO16       | 13.473 | <0.001 |

|                      |        |        |
|----------------------|--------|--------|
| NMO18 vs. SLE4       | 13.472 | <0.001 |
| NMO18 vs. MS5        | 13.472 | <0.001 |
| NMO18 vs. MS10       | 13.467 | <0.001 |
| NMO18 vs. CON6       | 13.467 | <0.001 |
| NMO18 vs. CON7       | 13.467 | <0.001 |
| NMO18 vs. MS1        | 13.464 | <0.001 |
| NMO18 vs. CON5       | 13.463 | <0.001 |
| NMO18 vs. NMO17      | 13.461 | <0.001 |
| NMO18 vs. CON1       | 13.461 | <0.001 |
| NMO18 vs. NMO9       | 13.459 | <0.001 |
| NMO18 vs. CON10      | 13.457 | <0.001 |
| NMO18 vs. CON4       | 13.453 | <0.001 |
| NMO18 vs. SLE11      | 13.452 | <0.001 |
| NMO18 vs. SLE pool   | 13.447 | <0.001 |
| NMO18 vs. CON9       | 13.446 | <0.001 |
| NMO18 vs. MS7        | 13.443 | <0.001 |
| NMO18 vs. NMO1       | 13.442 | <0.001 |
| NMO18 vs. MS9        | 13.426 | <0.001 |
| NMO18 vs. MS8        | 13.419 | <0.001 |
| NMO18 vs. MS3        | 13.402 | <0.001 |
| NMO18 vs. SLE8       | 13.397 | <0.001 |
| NMO18 vs. SLE1       | 13.125 | <0.001 |
| NMO18 vs. NMO2       | 3.336  | 0.048  |
| NMO18 vs. NMO6       | 2.253  | 0.111  |
| NMO6 vs. SLE17       | 11.301 | <0.001 |
| NMO6 vs. SLE16       | 11.296 | <0.001 |
| NMO6 vs. CON pool #2 | 11.276 | <0.001 |
| NMO6 vs. SLE18       | 11.275 | <0.001 |
| NMO6 vs. SLE9        | 11.273 | <0.001 |
| NMO6 vs. SLE6        | 11.269 | <0.001 |
| NMO6 vs. SLE5        | 11.268 | <0.001 |
| NMO6 vs. SLE3        | 11.263 | <0.001 |
| NMO6 vs. SLE10       | 11.262 | <0.001 |
| NMO6 vs. CON pool #1 | 11.261 | <0.001 |
| NMO6 vs. SLE15       | 11.255 | <0.001 |
| NMO6 vs. RRMS pool   | 11.25  | <0.001 |
| NMO6 vs. SLE2        | 11.249 | <0.001 |
| NMO6 vs. SLE7        | 11.245 | <0.001 |
| NMO6 vs. MS4         | 11.24  | <0.001 |
| NMO6 vs. CON2        | 11.24  | <0.001 |
| NMO6 vs. SLE13       | 11.239 | <0.001 |
| NMO6 vs. SLE12       | 11.237 | <0.001 |
| NMO6 vs. NMO20       | 11.237 | <0.001 |
| NMO6 vs. SLE14       | 11.233 | <0.001 |
| NMO6 vs. CON3        | 11.233 | <0.001 |
| NMO6 vs. NMO15       | 11.233 | <0.001 |
| NMO6 vs. CON pool #1 | 11.229 | <0.001 |
| NMO6 vs. CON8        | 11.228 | <0.001 |
| NMO6 vs. NMO13       | 11.228 | <0.001 |
| NMO6 vs. MS2         | 11.228 | <0.001 |
| NMO6 vs. MS6         | 11.227 | <0.001 |
| NMO6 vs. NMO12       | 11.227 | <0.001 |
| NMO6 vs. NMO10       | 11.226 | <0.001 |
| NMO6 vs. NMO4        | 11.222 | <0.001 |
| NMO6 vs. NMO19       | 11.222 | <0.001 |
| NMO6 vs. NMO11       | 11.221 | <0.001 |
| NMO6 vs. NMO16       | 11.22  | <0.001 |
| NMO6 vs. SLE4        | 11.219 | <0.001 |
| NMO6 vs. MS5         | 11.218 | <0.001 |
| NMO6 vs. MS10        | 11.214 | <0.001 |
| NMO6 vs. CON6        | 11.214 | <0.001 |
| NMO6 vs. CON7        | 11.214 | <0.001 |
| NMO6 vs. MS1         | 11.21  | <0.001 |
| NMO6 vs. CON5        | 11.21  | <0.001 |
| NMO6 vs. NMO17       | 11.208 | <0.001 |
| NMO6 vs. CON1        | 11.208 | <0.001 |

|                      |        |        |
|----------------------|--------|--------|
| NMO6 vs. NMO9        | 11.206 | <0.001 |
| NMO6 vs. CON10       | 11.203 | <0.001 |
| NMO6 vs. CON4        | 11.2   | <0.001 |
| NMO6 vs. SLE11       | 11.198 | <0.001 |
| NMO6 vs. SLE pool    | 11.194 | <0.001 |
| NMO6 vs. CON9        | 11.192 | <0.001 |
| NMO6 vs. MS7         | 11.19  | <0.001 |
| NMO6 vs. NMO1        | 11.188 | <0.001 |
| NMO6 vs. MS9         | 11.173 | <0.001 |
| NMO6 vs. MS8         | 11.166 | <0.001 |
| NMO6 vs. MS3         | 11.149 | <0.001 |
| NMO6 vs. SLE8        | 11.143 | <0.001 |
| NMO6 vs. SLE1        | 10.871 | <0.001 |
| NMO6 vs. NMO2        | 1.083  | 0.444  |
| NMO2 vs. SLE17       | 10.218 | <0.001 |
| NMO2 vs. SLE16       | 10.213 | <0.001 |
| NMO2 vs. CON pool #2 | 10.193 | <0.001 |
| NMO2 vs. SLE18       | 10.192 | <0.001 |
| NMO2 vs. SLE9        | 10.19  | <0.001 |
| NMO2 vs. SLE6        | 10.187 | <0.001 |
| NMO2 vs. SLE5        | 10.185 | <0.001 |
| NMO2 vs. SLE3        | 10.18  | <0.001 |
| NMO2 vs. SLE10       | 10.179 | <0.001 |
| NMO2 vs. CON pool #1 | 10.178 | <0.001 |
| NMO2 vs. SLE15       | 10.173 | <0.001 |
| NMO2 vs. RRMS pool   | 10.167 | <0.001 |
| NMO2 vs. SLE2        | 10.166 | <0.001 |
| NMO2 vs. SLE7        | 10.163 | <0.001 |
| NMO2 vs. MS4         | 10.158 | <0.001 |
| NMO2 vs. CON2        | 10.158 | <0.001 |
| NMO2 vs. SLE13       | 10.156 | <0.001 |
| NMO2 vs. SLE12       | 10.155 | <0.001 |
| NMO2 vs. NMO20       | 10.154 | <0.001 |
| NMO2 vs. SLE14       | 10.15  | <0.001 |
| NMO2 vs. CON3        | 10.15  | <0.001 |
| NMO2 vs. NMO15       | 10.15  | <0.001 |
| NMO2 vs. CON pool #1 | 10.147 | <0.001 |
| NMO2 vs. CON8        | 10.146 | <0.001 |
| NMO2 vs. NMO13       | 10.145 | <0.001 |
| NMO2 vs. MS2         | 10.145 | <0.001 |
| NMO2 vs. MS6         | 10.145 | <0.001 |
| NMO2 vs. NMO12       | 10.145 | <0.001 |
| NMO2 vs. NMO10       | 10.143 | <0.001 |
| NMO2 vs. NMO4        | 10.14  | <0.001 |
| NMO2 vs. NMO19       | 10.139 | <0.001 |
| NMO2 vs. NMO11       | 10.139 | <0.001 |
| NMO2 vs. NMO16       | 10.137 | <0.001 |
| NMO2 vs. SLE4        | 10.137 | <0.001 |
| NMO2 vs. MS5         | 10.136 | <0.001 |
| NMO2 vs. MS10        | 10.132 | <0.001 |
| NMO2 vs. CON6        | 10.131 | <0.001 |
| NMO2 vs. CON7        | 10.131 | <0.001 |
| NMO2 vs. MS1         | 10.128 | <0.001 |
| NMO2 vs. CON5        | 10.127 | <0.001 |
| NMO2 vs. NMO17       | 10.125 | <0.001 |
| NMO2 vs. CON1        | 10.125 | <0.001 |
| NMO2 vs. NMO9        | 10.123 | <0.001 |
| NMO2 vs. CON10       | 10.121 | <0.001 |
| NMO2 vs. CON4        | 10.117 | <0.001 |
| NMO2 vs. SLE11       | 10.116 | <0.001 |
| NMO2 vs. SLE pool    | 10.111 | <0.001 |
| NMO2 vs. CON9        | 10.11  | <0.001 |
| NMO2 vs. MS7         | 10.107 | <0.001 |
| NMO2 vs. NMO1        | 10.106 | <0.001 |
| NMO2 vs. MS9         | 10.09  | <0.001 |
| NMO2 vs. MS8         | 10.083 | <0.001 |



|                      |        |        |
|----------------------|--------|--------|
| NMO2 vs. MS3         | 10.066 | <0.001 |
| NMO2 vs. SLE8        | 10.061 | <0.001 |
| NMO2 vs. SLE1        | 9.789  | <0.001 |
| SLE1 vs. SLE17       | 0.429  | 1      |
| SLE1 vs. SLE16       | 0.424  | 1      |
| SLE1 vs. CON pool #2 | 0.405  | 1      |
| SLE1 vs. SLE18       | 0.404  | 1      |
| SLE1 vs. SLE9        | 0.401  | 1      |
| SLE1 vs. SLE6        | 0.398  | 1      |
| SLE1 vs. SLE5        | 0.397  | 1      |
| SLE1 vs. SLE3        | 0.392  | 1      |
| SLE1 vs. SLE10       | 0.39   | 1      |
| SLE1 vs. CON pool #1 | 0.389  | 1      |
| SLE1 vs. SLE15       | 0.384  | 1      |
| SLE1 vs. RRMS pool   | 0.378  | 1      |
| SLE1 vs. SLE2        | 0.377  | 1      |
| SLE1 vs. SLE7        | 0.374  | 1      |
| SLE1 vs. MS4         | 0.369  | 1      |
| SLE1 vs. CON2        | 0.369  | 1      |
| SLE1 vs. SLE13       | 0.367  | 1      |
| SLE1 vs. SLE12       | 0.366  | 1      |
| SLE1 vs. NMO20       | 0.366  | 1      |
| SLE1 vs. SLE14       | 0.361  | 1      |
| SLE1 vs. CON3        | 0.361  | 1      |
| SLE1 vs. NMO15       | 0.361  | 1      |
| SLE1 vs. CON pool #1 | 0.358  | 1      |
| SLE1 vs. CON8        | 0.357  | 1      |
| SLE1 vs. NMO13       | 0.357  | 1      |
| SLE1 vs. MS2         | 0.356  | 1      |
| SLE1 vs. MS6         | 0.356  | 1      |
| SLE1 vs. NMO12       | 0.356  | 1      |
| SLE1 vs. NMO10       | 0.355  | 1      |
| SLE1 vs. NMO4        | 0.351  | 1      |
| SLE1 vs. NMO19       | 0.351  | 1      |
| SLE1 vs. NMO11       | 0.35   | 1      |
| SLE1 vs. NMO16       | 0.349  | 1      |
| SLE1 vs. SLE4        | 0.348  | 1      |
| SLE1 vs. MS5         | 0.347  | 1      |
| SLE1 vs. MS10        | 0.343  | 1      |
| SLE1 vs. CON6        | 0.342  | 1      |
| SLE1 vs. CON7        | 0.342  | 1      |
| SLE1 vs. MS1         | 0.339  | 1      |
| SLE1 vs. CON5        | 0.339  | 1      |
| SLE1 vs. NMO17       | 0.337  | 1      |
| SLE1 vs. CON1        | 0.336  | 1      |
| SLE1 vs. NMO9        | 0.335  | 1      |
| SLE1 vs. CON10       | 0.332  | 1      |
| SLE1 vs. CON4        | 0.329  | 1      |
| SLE1 vs. SLE11       | 0.327  | 1      |
| SLE1 vs. SLE pool    | 0.322  | 1      |
| SLE1 vs. CON9        | 0.321  | 1      |
| SLE1 vs. MS7         | 0.319  | 1      |
| SLE1 vs. NMO1        | 0.317  | 1      |
| SLE1 vs. MS9         | 0.301  | 1      |
| SLE1 vs. MS8         | 0.294  | 0.997  |
| SLE1 vs. MS3         | 0.277  | 0.979  |
| SLE1 vs. SLE8        | 0.272  | 0.847  |
| SLE8 vs. SLE17       | 0.157  | 1      |
| SLE8 vs. SLE16       | 0.152  | 1      |
| SLE8 vs. CON pool #2 | 0.133  | 1      |
| SLE8 vs. SLE18       | 0.131  | 1      |
| SLE8 vs. SLE9        | 0.129  | 1      |
| SLE8 vs. SLE6        | 0.126  | 1      |
| SLE8 vs. SLE5        | 0.125  | 1      |
| SLE8 vs. SLE3        | 0.119  | 1      |
| SLE8 vs. SLE10       | 0.118  | 1      |

|                      |         |       |
|----------------------|---------|-------|
| SLE8 vs. CON pool #1 | 0.117   | 1     |
| SLE8 vs. SLE15       | 0.112   | 1     |
| SLE8 vs. RRMS pool   | 0.106   | 1     |
| SLE8 vs. SLE2        | 0.105   | 1     |
| SLE8 vs. SLE7        | 0.102   | 1     |
| SLE8 vs. MS4         | 0.0968  | 1     |
| SLE8 vs. CON2        | 0.0966  | 1     |
| SLE8 vs. SLE13       | 0.0952  | 1     |
| SLE8 vs. SLE12       | 0.094   | 1     |
| SLE8 vs. NMO20       | 0.0935  | 1     |
| SLE8 vs. SLE14       | 0.0893  | 1     |
| SLE8 vs. CON3        | 0.0892  | 1     |
| SLE8 vs. NMO15       | 0.0891  | 1     |
| SLE8 vs. CON pool #1 | 0.0857  | 1     |
| SLE8 vs. CON8        | 0.0848  | 1     |
| SLE8 vs. NMO13       | 0.0846  | 1     |
| SLE8 vs. MS2         | 0.0841  | 1     |
| SLE8 vs. MS6         | 0.0837  | 1     |
| SLE8 vs. NMO12       | 0.0836  | 1     |
| SLE8 vs. NMO10       | 0.0825  | 1     |
| SLE8 vs. NMO4        | 0.0788  | 1     |
| SLE8 vs. NMO19       | 0.0785  | 1     |
| SLE8 vs. NMO11       | 0.0776  | 1     |
| SLE8 vs. NMO16       | 0.0764  | 1     |
| SLE8 vs. SLE4        | 0.0758  | 1     |
| SLE8 vs. MS5         | 0.075   | 1     |
| SLE8 vs. MS10        | 0.0707  | 1     |
| SLE8 vs. CON6        | 0.0703  | 1     |
| SLE8 vs. CON7        | 0.0703  | 1     |
| SLE8 vs. MS1         | 0.0669  | 1     |
| SLE8 vs. CON5        | 0.0664  | 1     |
| SLE8 vs. NMO17       | 0.0645  | 1     |
| SLE8 vs. CON1        | 0.0643  | 1     |
| SLE8 vs. NMO9        | 0.0625  | 1     |
| SLE8 vs. CON10       | 0.0599  | 1     |
| SLE8 vs. CON4        | 0.0565  | 1     |
| SLE8 vs. SLE11       | 0.055   | 1     |
| SLE8 vs. SLE pool    | 0.0502  | 1     |
| SLE8 vs. CON9        | 0.049   | 1     |
| SLE8 vs. MS7         | 0.0465  | 1     |
| SLE8 vs. NMO1        | 0.0448  | 1     |
| SLE8 vs. MS9         | 0.0292  | 1     |
| SLE8 vs. MS8         | 0.0222  | 1     |
| SLE8 vs. MS3         | 0.00517 | 0.997 |
| MS3 vs. SLE17        | 0.152   | 1     |
| MS3 vs. SLE16        | 0.147   | 1     |
| MS3 vs. CON pool #2  | 0.127   | 1     |
| MS3 vs. SLE18        | 0.126   | 1     |
| MS3 vs. SLE9         | 0.124   | 1     |
| MS3 vs. SLE6         | 0.121   | 1     |
| MS3 vs. SLE5         | 0.119   | 1     |
| MS3 vs. SLE3         | 0.114   | 1     |
| MS3 vs. SLE10        | 0.113   | 1     |
| MS3 vs. CON pool #1  | 0.112   | 1     |
| MS3 vs. SLE15        | 0.107   | 1     |
| MS3 vs. RRMS pool    | 0.101   | 1     |
| MS3 vs. SLE2         | 0.0999  | 1     |
| MS3 vs. SLE7         | 0.0967  | 1     |
| MS3 vs. MS4          | 0.0917  | 1     |
| MS3 vs. CON2         | 0.0915  | 1     |
| MS3 vs. SLE13        | 0.09    | 1     |
| MS3 vs. SLE12        | 0.0888  | 1     |
| MS3 vs. NMO20        | 0.0883  | 1     |
| MS3 vs. SLE14        | 0.0842  | 1     |
| MS3 vs. CON3         | 0.084   | 1     |
| MS3 vs. NMO15        | 0.084   | 1     |

|                     |        |      |
|---------------------|--------|------|
| MS3 vs. CON pool #1 | 0.0805 | 1    |
| MS3 vs. CON8        | 0.0796 | 1    |
| MS3 vs. NMO13       | 0.0794 | 1    |
| MS3 vs. MS2         | 0.0789 | 1    |
| MS3 vs. MS6         | 0.0785 | 1    |
| MS3 vs. NMO12       | 0.0785 | 1    |
| MS3 vs. NMO10       | 0.0773 | 1    |
| MS3 vs. NMO4        | 0.0736 | 1    |
| MS3 vs. NMO19       | 0.0734 | 1    |
| MS3 vs. NMO11       | 0.0724 | 1    |
| MS3 vs. NMO16       | 0.0712 | 1    |
| MS3 vs. SLE4        | 0.0706 | 1    |
| MS3 vs. MS5         | 0.0698 | 1    |
| MS3 vs. MS10        | 0.0656 | 1    |
| MS3 vs. CON6        | 0.0651 | 1    |
| MS3 vs. CON7        | 0.0651 | 1    |
| MS3 vs. MS1         | 0.0617 | 1    |
| MS3 vs. CON5        | 0.0613 | 1    |
| MS3 vs. NMO17       | 0.0593 | 1    |
| MS3 vs. CON1        | 0.0591 | 1    |
| MS3 vs. NMO9        | 0.0573 | 1    |
| MS3 vs. CON10       | 0.0547 | 1    |
| MS3 vs. CON4        | 0.0513 | 1    |
| MS3 vs. SLE11       | 0.0498 | 1    |
| MS3 vs. SLE pool    | 0.045  | 1    |
| MS3 vs. CON9        | 0.0438 | 1    |
| MS3 vs. MS7         | 0.0413 | 1    |
| MS3 vs. NMO1        | 0.0397 | 1    |
| MS3 vs. MS9         | 0.0241 | 1    |
| MS3 vs. MS8         | 0.017  | 0.99 |
| MS8 vs. SLE17       | 0.135  | 1    |
| MS8 vs. SLE16       | 0.13   | 1    |
| MS8 vs. CON pool #2 | 0.11   | 1    |
| MS8 vs. SLE18       | 0.109  | 1    |
| MS8 vs. SLE9        | 0.107  | 1    |
| MS8 vs. SLE6        | 0.104  | 1    |
| MS8 vs. SLE5        | 0.102  | 1    |
| MS8 vs. SLE3        | 0.0972 | 1    |
| MS8 vs. SLE10       | 0.0961 | 1    |
| MS8 vs. CON pool #1 | 0.095  | 1    |
| MS8 vs. SLE15       | 0.0897 | 1    |
| MS8 vs. RRMS pool   | 0.084  | 1    |
| MS8 vs. SLE2        | 0.0828 | 1    |
| MS8 vs. SLE7        | 0.0797 | 1    |
| MS8 vs. MS4         | 0.0746 | 1    |
| MS8 vs. CON2        | 0.0744 | 1    |
| MS8 vs. SLE13       | 0.073  | 1    |
| MS8 vs. SLE12       | 0.0718 | 1    |
| MS8 vs. NMO20       | 0.0713 | 1    |
| MS8 vs. SLE14       | 0.0671 | 1    |
| MS8 vs. CON3        | 0.0669 | 1    |
| MS8 vs. NMO15       | 0.0669 | 1    |
| MS8 vs. CON pool #1 | 0.0635 | 1    |
| MS8 vs. CON8        | 0.0626 | 1    |
| MS8 vs. NMO13       | 0.0624 | 1    |
| MS8 vs. MS2         | 0.0619 | 1    |
| MS8 vs. MS6         | 0.0614 | 1    |
| MS8 vs. NMO12       | 0.0614 | 1    |
| MS8 vs. NMO10       | 0.0603 | 1    |
| MS8 vs. NMO4        | 0.0565 | 1    |
| MS8 vs. NMO19       | 0.0563 | 1    |
| MS8 vs. NMO11       | 0.0554 | 1    |
| MS8 vs. NMO16       | 0.0542 | 1    |
| MS8 vs. SLE4        | 0.0536 | 1    |
| MS8 vs. MS5         | 0.0528 | 1    |
| MS8 vs. MS10        | 0.0485 | 1    |

|                     |         |       |
|---------------------|---------|-------|
| MS8 vs. CON6        | 0.0481  | 1     |
| MS8 vs. CON7        | 0.048   | 1     |
| MS8 vs. MS1         | 0.0446  | 1     |
| MS8 vs. CON5        | 0.0442  | 1     |
| MS8 vs. NMO17       | 0.0423  | 1     |
| MS8 vs. CON1        | 0.042   | 1     |
| MS8 vs. NMO9        | 0.0403  | 1     |
| MS8 vs. CON10       | 0.0377  | 1     |
| MS8 vs. CON4        | 0.0342  | 1     |
| MS8 vs. SLE11       | 0.0328  | 1     |
| MS8 vs. SLE pool    | 0.0279  | 1     |
| MS8 vs. CON9        | 0.0268  | 1     |
| MS8 vs. MS7         | 0.0243  | 1     |
| MS8 vs. NMO1        | 0.0226  | 1     |
| MS8 vs. MS9         | 0.00703 | 0.996 |
| MS9 vs. SLE17       | 0.128   | 1     |
| MS9 vs. SLE16       | 0.123   | 1     |
| MS9 vs. CON pool #2 | 0.103   | 1     |
| MS9 vs. SLE18       | 0.102   | 1     |
| MS9 vs. SLE9        | 0.0999  | 1     |
| MS9 vs. SLE6        | 0.0965  | 1     |
| MS9 vs. SLE5        | 0.0953  | 1     |
| MS9 vs. SLE3        | 0.0902  | 1     |
| MS9 vs. SLE10       | 0.0891  | 1     |
| MS9 vs. CON pool #1 | 0.0879  | 1     |
| MS9 vs. SLE15       | 0.0826  | 1     |
| MS9 vs. RRMS pool   | 0.077   | 1     |
| MS9 vs. SLE2        | 0.0758  | 1     |
| MS9 vs. SLE7        | 0.0726  | 1     |
| MS9 vs. MS4         | 0.0676  | 1     |
| MS9 vs. CON2        | 0.0674  | 1     |
| MS9 vs. SLE13       | 0.0659  | 1     |
| MS9 vs. SLE12       | 0.0647  | 1     |
| MS9 vs. NMO20       | 0.0642  | 1     |
| MS9 vs. SLE14       | 0.0601  | 1     |
| MS9 vs. CON3        | 0.0599  | 1     |
| MS9 vs. NMO15       | 0.0599  | 1     |
| MS9 vs. CON pool #1 | 0.0565  | 1     |
| MS9 vs. CON8        | 0.0555  | 1     |
| MS9 vs. NMO13       | 0.0553  | 1     |
| MS9 vs. MS2         | 0.0549  | 1     |
| MS9 vs. MS6         | 0.0544  | 1     |
| MS9 vs. NMO12       | 0.0544  | 1     |
| MS9 vs. NMO10       | 0.0533  | 1     |
| MS9 vs. NMO4        | 0.0495  | 1     |
| MS9 vs. NMO19       | 0.0493  | 1     |
| MS9 vs. NMO11       | 0.0484  | 1     |
| MS9 vs. NMO16       | 0.0472  | 1     |
| MS9 vs. SLE4        | 0.0465  | 1     |
| MS9 vs. MS5         | 0.0457  | 1     |
| MS9 vs. MS10        | 0.0415  | 1     |
| MS9 vs. CON6        | 0.041   | 1     |
| MS9 vs. CON7        | 0.041   | 1     |
| MS9 vs. MS1         | 0.0376  | 1     |
| MS9 vs. CON5        | 0.0372  | 1     |
| MS9 vs. NMO17       | 0.0353  | 1     |
| MS9 vs. CON1        | 0.035   | 1     |
| MS9 vs. NMO9        | 0.0333  | 1     |
| MS9 vs. CON10       | 0.0306  | 1     |
| MS9 vs. CON4        | 0.0272  | 1     |
| MS9 vs. SLE11       | 0.0258  | 1     |
| MS9 vs. SLE pool    | 0.0209  | 1     |
| MS9 vs. CON9        | 0.0198  | 1     |
| MS9 vs. MS7         | 0.0172  | 1     |
| MS9 vs. NMO1        | 0.0156  | 0.991 |
| NMO1 vs. SLE17      | 0.113   | 1     |

|                      |         |       |
|----------------------|---------|-------|
| NMO1 vs. SLE16       | 0.107   | 1     |
| NMO1 vs. CON pool #2 | 0.0877  | 1     |
| NMO1 vs. SLE18       | 0.0866  | 1     |
| NMO1 vs. SLE9        | 0.0843  | 1     |
| NMO1 vs. SLE6        | 0.0809  | 1     |
| NMO1 vs. SLE5        | 0.0797  | 1     |
| NMO1 vs. SLE3        | 0.0746  | 1     |
| NMO1 vs. SLE10       | 0.0735  | 1     |
| NMO1 vs. CON pool #1 | 0.0723  | 1     |
| NMO1 vs. SLE15       | 0.067   | 1     |
| NMO1 vs. RRMS pool   | 0.0614  | 1     |
| NMO1 vs. SLE2        | 0.0602  | 1     |
| NMO1 vs. SLE7        | 0.057   | 1     |
| NMO1 vs. MS4         | 0.052   | 1     |
| NMO1 vs. CON2        | 0.0518  | 1     |
| NMO1 vs. SLE13       | 0.0503  | 1     |
| NMO1 vs. SLE12       | 0.0491  | 1     |
| NMO1 vs. NMO20       | 0.0486  | 1     |
| NMO1 vs. SLE14       | 0.0445  | 1     |
| NMO1 vs. CON3        | 0.0443  | 1     |
| NMO1 vs. NMO15       | 0.0443  | 1     |
| NMO1 vs. CON pool #1 | 0.0409  | 1     |
| NMO1 vs. CON8        | 0.0399  | 1     |
| NMO1 vs. NMO13       | 0.0397  | 1     |
| NMO1 vs. MS2         | 0.0393  | 1     |
| NMO1 vs. MS6         | 0.0388  | 1     |
| NMO1 vs. NMO12       | 0.0388  | 1     |
| NMO1 vs. NMO10       | 0.0377  | 1     |
| NMO1 vs. NMO4        | 0.0339  | 1     |
| NMO1 vs. NMO19       | 0.0337  | 1     |
| NMO1 vs. NMO11       | 0.0328  | 1     |
| NMO1 vs. NMO16       | 0.0316  | 1     |
| NMO1 vs. SLE4        | 0.0309  | 1     |
| NMO1 vs. MS5         | 0.0301  | 1     |
| NMO1 vs. MS10        | 0.0259  | 1     |
| NMO1 vs. CON6        | 0.0254  | 1     |
| NMO1 vs. CON7        | 0.0254  | 1     |
| NMO1 vs. MS1         | 0.022   | 1     |
| NMO1 vs. CON5        | 0.0216  | 1     |
| NMO1 vs. NMO17       | 0.0197  | 1     |
| NMO1 vs. CON1        | 0.0194  | 1     |
| NMO1 vs. NMO9        | 0.0177  | 1     |
| NMO1 vs. CON10       | 0.015   | 1     |
| NMO1 vs. CON4        | 0.0116  | 1     |
| NMO1 vs. SLE11       | 0.0102  | 1     |
| NMO1 vs. SLE pool    | 0.00532 | 1     |
| NMO1 vs. CON9        | 0.00417 | 1     |
| NMO1 vs. MS7         | 0.00165 | 0.999 |
| MS7 vs. SLE17        | 0.111   | 1     |
| MS7 vs. SLE16        | 0.106   | 1     |
| MS7 vs. CON pool #2  | 0.0861  | 1     |
| MS7 vs. SLE18        | 0.085   | 1     |
| MS7 vs. SLE9         | 0.0827  | 1     |
| MS7 vs. SLE6         | 0.0792  | 1     |
| MS7 vs. SLE5         | 0.0781  | 1     |
| MS7 vs. SLE3         | 0.0729  | 1     |
| MS7 vs. SLE10        | 0.0718  | 1     |
| MS7 vs. CON pool #1  | 0.0707  | 1     |
| MS7 vs. SLE15        | 0.0654  | 1     |
| MS7 vs. RRMS pool    | 0.0597  | 1     |
| MS7 vs. SLE2         | 0.0586  | 1     |
| MS7 vs. SLE7         | 0.0554  | 1     |
| MS7 vs. MS4          | 0.0503  | 1     |
| MS7 vs. CON2         | 0.0501  | 1     |
| MS7 vs. SLE13        | 0.0487  | 1     |
| MS7 vs. SLE12        | 0.0475  | 1     |

|                      |         |       |
|----------------------|---------|-------|
| MS7 vs. NMO20        | 0.047   | 1     |
| MS7 vs. SLE14        | 0.0428  | 1     |
| MS7 vs. CON3         | 0.0427  | 1     |
| MS7 vs. NMO15        | 0.0427  | 1     |
| MS7 vs. CON pool #1  | 0.0392  | 1     |
| MS7 vs. CON8         | 0.0383  | 1     |
| MS7 vs. NMO13        | 0.0381  | 1     |
| MS7 vs. MS2          | 0.0376  | 1     |
| MS7 vs. MS6          | 0.0372  | 1     |
| MS7 vs. NMO12        | 0.0371  | 1     |
| MS7 vs. NMO10        | 0.036   | 1     |
| MS7 vs. NMO4         | 0.0323  | 1     |
| MS7 vs. NMO19        | 0.032   | 1     |
| MS7 vs. NMO11        | 0.0311  | 1     |
| MS7 vs. NMO16        | 0.0299  | 1     |
| MS7 vs. SLE4         | 0.0293  | 1     |
| MS7 vs. MS5          | 0.0285  | 1     |
| MS7 vs. MS10         | 0.0242  | 1     |
| MS7 vs. CON6         | 0.0238  | 1     |
| MS7 vs. CON7         | 0.0238  | 1     |
| MS7 vs. MS1          | 0.0204  | 1     |
| MS7 vs. CON5         | 0.0199  | 1     |
| MS7 vs. NMO17        | 0.018   | 1     |
| MS7 vs. CON1         | 0.0178  | 1     |
| MS7 vs. NMO9         | 0.016   | 1     |
| MS7 vs. CON10        | 0.0134  | 1     |
| MS7 vs. CON4         | 0.00996 | 1     |
| MS7 vs. SLE11        | 0.00851 | 1     |
| MS7 vs. SLE pool     | 0.00367 | 1     |
| MS7 vs. CON9         | 0.00252 | 0.999 |
| CON9 vs. SLE17       | 0.108   | 1     |
| CON9 vs. SLE16       | 0.103   | 1     |
| CON9 vs. CON pool #2 | 0.0836  | 1     |
| CON9 vs. SLE18       | 0.0824  | 1     |
| CON9 vs. SLE9        | 0.0802  | 1     |
| CON9 vs. SLE6        | 0.0767  | 1     |
| CON9 vs. SLE5        | 0.0756  | 1     |
| CON9 vs. SLE3        | 0.0704  | 1     |
| CON9 vs. SLE10       | 0.0693  | 1     |
| CON9 vs. CON pool #1 | 0.0682  | 1     |
| CON9 vs. SLE15       | 0.0629  | 1     |
| CON9 vs. RRMS pool   | 0.0572  | 1     |
| CON9 vs. SLE2        | 0.056   | 1     |
| CON9 vs. SLE7        | 0.0529  | 1     |
| CON9 vs. MS4         | 0.0478  | 1     |
| CON9 vs. CON2        | 0.0476  | 1     |
| CON9 vs. SLE13       | 0.0462  | 1     |
| CON9 vs. SLE12       | 0.045   | 1     |
| CON9 vs. NMO20       | 0.0445  | 1     |
| CON9 vs. SLE14       | 0.0403  | 1     |
| CON9 vs. CON3        | 0.0402  | 1     |
| CON9 vs. NMO15       | 0.0401  | 1     |
| CON9 vs. CON pool #1 | 0.0367  | 1     |
| CON9 vs. CON8        | 0.0358  | 1     |
| CON9 vs. NMO13       | 0.0356  | 1     |
| CON9 vs. MS2         | 0.0351  | 1     |
| CON9 vs. MS6         | 0.0346  | 1     |
| CON9 vs. NMO12       | 0.0346  | 1     |
| CON9 vs. NMO10       | 0.0335  | 1     |
| CON9 vs. NMO4        | 0.0297  | 1     |
| CON9 vs. NMO19       | 0.0295  | 1     |
| CON9 vs. NMO11       | 0.0286  | 1     |
| CON9 vs. NMO16       | 0.0274  | 1     |
| CON9 vs. SLE4        | 0.0268  | 1     |
| CON9 vs. MS5         | 0.026   | 1     |
| CON9 vs. MS10        | 0.0217  | 1     |

|                          |         |       |
|--------------------------|---------|-------|
| CON9 vs. CON6            | 0.0213  | 1     |
| CON9 vs. CON7            | 0.0212  | 1     |
| CON9 vs. MS1             | 0.0179  | 1     |
| CON9 vs. CON5            | 0.0174  | 1     |
| CON9 vs. NMO17           | 0.0155  | 1     |
| CON9 vs. CON1            | 0.0152  | 1     |
| CON9 vs. NMO9            | 0.0135  | 1     |
| CON9 vs. CON10           | 0.0109  | 1     |
| CON9 vs. CON4            | 0.00745 | 1     |
| CON9 vs. SLE11           | 0.00599 | 1     |
| CON9 vs. SLE pool        | 0.00115 | 0.999 |
| SLE pool vs. SLE17       | 0.107   | 1     |
| SLE pool vs. SLE16       | 0.102   | 1     |
| SLE pool vs. CON pool #2 | 0.0824  | 1     |
| SLE pool vs. SLE18       | 0.0813  | 1     |
| SLE pool vs. SLE9        | 0.079   | 1     |
| SLE pool vs. SLE6        | 0.0756  | 1     |
| SLE pool vs. SLE5        | 0.0744  | 1     |
| SLE pool vs. SLE3        | 0.0693  | 1     |
| SLE pool vs. SLE10       | 0.0681  | 1     |
| SLE pool vs. CON pool #1 | 0.067   | 1     |
| SLE pool vs. SLE15       | 0.0617  | 1     |
| SLE pool vs. RRMS pool   | 0.0561  | 1     |
| SLE pool vs. SLE2        | 0.0549  | 1     |
| SLE pool vs. SLE7        | 0.0517  | 1     |
| SLE pool vs. MS4         | 0.0467  | 1     |
| SLE pool vs. CON2        | 0.0465  | 1     |
| SLE pool vs. SLE13       | 0.045   | 1     |
| SLE pool vs. SLE12       | 0.0438  | 1     |
| SLE pool vs. NMO20       | 0.0433  | 1     |
| SLE pool vs. SLE14       | 0.0392  | 1     |
| SLE pool vs. CON3        | 0.039   | 1     |
| SLE pool vs. NMO15       | 0.039   | 1     |
| SLE pool vs. CON pool #1 | 0.0355  | 1     |
| SLE pool vs. CON8        | 0.0346  | 1     |
| SLE pool vs. NMO13       | 0.0344  | 1     |
| SLE pool vs. MS2         | 0.034   | 1     |
| SLE pool vs. MS6         | 0.0335  | 1     |
| SLE pool vs. NMO12       | 0.0335  | 1     |
| SLE pool vs. NMO10       | 0.0323  | 1     |
| SLE pool vs. NMO4        | 0.0286  | 1     |
| SLE pool vs. NMO19       | 0.0284  | 1     |
| SLE pool vs. NMO11       | 0.0274  | 1     |
| SLE pool vs. NMO16       | 0.0263  | 1     |
| SLE pool vs. SLE4        | 0.0256  | 1     |
| SLE pool vs. MS5         | 0.0248  | 1     |
| SLE pool vs. MS10        | 0.0206  | 1     |
| SLE pool vs. CON6        | 0.0201  | 1     |
| SLE pool vs. CON7        | 0.0201  | 1     |
| SLE pool vs. MS1         | 0.0167  | 1     |
| SLE pool vs. CON5        | 0.0163  | 1     |
| SLE pool vs. NMO17       | 0.0143  | 1     |
| SLE pool vs. CON1        | 0.0141  | 1     |
| SLE pool vs. NMO9        | 0.0123  | 1     |
| SLE pool vs. CON10       | 0.00971 | 1     |
| SLE pool vs. CON4        | 0.00629 | 1     |
| SLE pool vs. SLE11       | 0.00484 | 0.997 |
| SLE11 vs. SLE17          | 0.102   | 1     |
| SLE11 vs. SLE16          | 0.0973  | 1     |
| SLE11 vs. CON pool #2    | 0.0776  | 1     |
| SLE11 vs. SLE18          | 0.0765  | 1     |
| SLE11 vs. SLE9           | 0.0742  | 1     |
| SLE11 vs. SLE6           | 0.0707  | 1     |
| SLE11 vs. SLE5           | 0.0696  | 1     |
| SLE11 vs. SLE3           | 0.0644  | 1     |
| SLE11 vs. SLE10          | 0.0633  | 1     |

|                       |         |       |
|-----------------------|---------|-------|
| SLE11 vs. CON pool #1 | 0.0622  | 1     |
| SLE11 vs. SLE15       | 0.0569  | 1     |
| SLE11 vs. RRMS pool   | 0.0512  | 1     |
| SLE11 vs. SLE2        | 0.0501  | 1     |
| SLE11 vs. SLE7        | 0.0469  | 1     |
| SLE11 vs. MS4         | 0.0418  | 1     |
| SLE11 vs. CON2        | 0.0416  | 1     |
| SLE11 vs. SLE13       | 0.0402  | 1     |
| SLE11 vs. SLE12       | 0.039   | 1     |
| SLE11 vs. NMO20       | 0.0385  | 1     |
| SLE11 vs. SLE14       | 0.0343  | 1     |
| SLE11 vs. CON3        | 0.0342  | 1     |
| SLE11 vs. NMO15       | 0.0341  | 1     |
| SLE11 vs. CON pool #1 | 0.0307  | 1     |
| SLE11 vs. CON8        | 0.0298  | 1     |
| SLE11 vs. NMO13       | 0.0296  | 1     |
| SLE11 vs. MS2         | 0.0291  | 1     |
| SLE11 vs. MS6         | 0.0287  | 1     |
| SLE11 vs. NMO12       | 0.0286  | 1     |
| SLE11 vs. NMO10       | 0.0275  | 1     |
| SLE11 vs. NMO4        | 0.0238  | 1     |
| SLE11 vs. NMO19       | 0.0235  | 1     |
| SLE11 vs. NMO11       | 0.0226  | 1     |
| SLE11 vs. NMO16       | 0.0214  | 1     |
| SLE11 vs. SLE4        | 0.0208  | 1     |
| SLE11 vs. MS5         | 0.02    | 1     |
| SLE11 vs. MS10        | 0.0157  | 1     |
| SLE11 vs. CON6        | 0.0153  | 1     |
| SLE11 vs. CON7        | 0.0153  | 1     |
| SLE11 vs. MS1         | 0.0119  | 1     |
| SLE11 vs. CON5        | 0.0114  | 1     |
| SLE11 vs. NMO17       | 0.0095  | 1     |
| SLE11 vs. CON1        | 0.00925 | 1     |
| SLE11 vs. NMO9        | 0.0075  | 1     |
| SLE11 vs. CON10       | 0.00488 | 1     |
| SLE11 vs. CON4        | 0.00146 | 0.999 |
| CON4 vs. SLE17        | 0.101   | 1     |
| CON4 vs. SLE16        | 0.0959  | 1     |
| CON4 vs. CON pool #2  | 0.0761  | 1     |
| CON4 vs. SLE18        | 0.075   | 1     |
| CON4 vs. SLE9         | 0.0727  | 1     |
| CON4 vs. SLE6         | 0.0693  | 1     |
| CON4 vs. SLE5         | 0.0681  | 1     |
| CON4 vs. SLE3         | 0.063   | 1     |
| CON4 vs. SLE10        | 0.0618  | 1     |
| CON4 vs. CON pool #1  | 0.0607  | 1     |
| CON4 vs. SLE15        | 0.0554  | 1     |
| CON4 vs. RRMS pool    | 0.0498  | 1     |
| CON4 vs. SLE2         | 0.0486  | 1     |
| CON4 vs. SLE7         | 0.0454  | 1     |
| CON4 vs. MS4          | 0.0404  | 1     |
| CON4 vs. CON2         | 0.0402  | 1     |
| CON4 vs. SLE13        | 0.0387  | 1     |
| CON4 vs. SLE12        | 0.0375  | 1     |
| CON4 vs. NMO20        | 0.037   | 1     |
| CON4 vs. SLE14        | 0.0329  | 1     |
| CON4 vs. CON3         | 0.0327  | 1     |
| CON4 vs. NMO15        | 0.0327  | 1     |
| CON4 vs. CON pool #1  | 0.0292  | 1     |
| CON4 vs. CON8         | 0.0283  | 1     |
| CON4 vs. NMO13        | 0.0281  | 1     |
| CON4 vs. MS2          | 0.0277  | 1     |
| CON4 vs. MS6          | 0.0272  | 1     |
| CON4 vs. NMO12        | 0.0272  | 1     |
| CON4 vs. NMO10        | 0.026   | 1     |
| CON4 vs. NMO4         | 0.0223  | 1     |

|                       |         |       |
|-----------------------|---------|-------|
| CON4 vs. NMO19        | 0.0221  | 1     |
| CON4 vs. NMO11        | 0.0211  | 1     |
| CON4 vs. NMO16        | 0.02    | 1     |
| CON4 vs. SLE4         | 0.0193  | 1     |
| CON4 vs. MS5          | 0.0185  | 1     |
| CON4 vs. MS10         | 0.0143  | 1     |
| CON4 vs. CON6         | 0.0138  | 1     |
| CON4 vs. CON7         | 0.0138  | 1     |
| CON4 vs. MS1          | 0.0104  | 1     |
| CON4 vs. CON5         | 0.00998 | 1     |
| CON4 vs. NMO17        | 0.00804 | 1     |
| CON4 vs. CON1         | 0.0078  | 1     |
| CON4 vs. NMO9         | 0.00604 | 1     |
| CON4 vs. CON10        | 0.00342 | 0.998 |
| CON10 vs. SLE17       | 0.0975  | 1     |
| CON10 vs. SLE16       | 0.0924  | 1     |
| CON10 vs. CON pool #2 | 0.0727  | 1     |
| CON10 vs. SLE18       | 0.0716  | 1     |
| CON10 vs. SLE9        | 0.0693  | 1     |
| CON10 vs. SLE6        | 0.0658  | 1     |
| CON10 vs. SLE5        | 0.0647  | 1     |
| CON10 vs. SLE3        | 0.0595  | 1     |
| CON10 vs. SLE10       | 0.0584  | 1     |
| CON10 vs. CON pool #1 | 0.0573  | 1     |
| CON10 vs. SLE15       | 0.052   | 1     |
| CON10 vs. RRMS pool   | 0.0463  | 1     |
| CON10 vs. SLE2        | 0.0452  | 1     |
| CON10 vs. SLE7        | 0.042   | 1     |
| CON10 vs. MS4         | 0.037   | 1     |
| CON10 vs. CON2        | 0.0367  | 1     |
| CON10 vs. SLE13       | 0.0353  | 1     |
| CON10 vs. SLE12       | 0.0341  | 1     |
| CON10 vs. NMO20       | 0.0336  | 1     |
| CON10 vs. SLE14       | 0.0294  | 1     |
| CON10 vs. CON3        | 0.0293  | 1     |
| CON10 vs. NMO15       | 0.0293  | 1     |
| CON10 vs. CON pool #1 | 0.0258  | 1     |
| CON10 vs. CON8        | 0.0249  | 1     |
| CON10 vs. NMO13       | 0.0247  | 1     |
| CON10 vs. MS2         | 0.0242  | 1     |
| CON10 vs. MS6         | 0.0238  | 1     |
| CON10 vs. NMO12       | 0.0238  | 1     |
| CON10 vs. NMO10       | 0.0226  | 1     |
| CON10 vs. NMO4        | 0.0189  | 1     |
| CON10 vs. NMO19       | 0.0187  | 1     |
| CON10 vs. NMO11       | 0.0177  | 1     |
| CON10 vs. NMO16       | 0.0165  | 1     |
| CON10 vs. SLE4        | 0.0159  | 1     |
| CON10 vs. MS5         | 0.0151  | 1     |
| CON10 vs. MS10        | 0.0109  | 1     |
| CON10 vs. CON6        | 0.0104  | 1     |
| CON10 vs. CON7        | 0.0104  | 1     |
| CON10 vs. MS1         | 0.00698 | 1     |
| CON10 vs. CON5        | 0.00656 | 1     |
| CON10 vs. NMO17       | 0.00462 | 1     |
| CON10 vs. CON1        | 0.00437 | 1     |
| CON10 vs. NMO9        | 0.00262 | 0.999 |
| NMO9 vs. SLE17        | 0.0949  | 1     |
| NMO9 vs. SLE16        | 0.0898  | 1     |
| NMO9 vs. CON pool #2  | 0.0701  | 1     |
| NMO9 vs. SLE18        | 0.069   | 1     |
| NMO9 vs. SLE9         | 0.0667  | 1     |
| NMO9 vs. SLE6         | 0.0632  | 1     |
| NMO9 vs. SLE5         | 0.0621  | 1     |
| NMO9 vs. SLE3         | 0.0569  | 1     |
| NMO9 vs. SLE10        | 0.0558  | 1     |

|                      |         |       |
|----------------------|---------|-------|
| NMO9 vs. CON pool #1 | 0.0547  | 1     |
| NMO9 vs. SLE15       | 0.0494  | 1     |
| NMO9 vs. RRMS pool   | 0.0437  | 1     |
| NMO9 vs. SLE2        | 0.0426  | 1     |
| NMO9 vs. SLE7        | 0.0394  | 1     |
| NMO9 vs. MS4         | 0.0343  | 1     |
| NMO9 vs. CON2        | 0.0341  | 1     |
| NMO9 vs. SLE13       | 0.0327  | 1     |
| NMO9 vs. SLE12       | 0.0315  | 1     |
| NMO9 vs. NMO20       | 0.031   | 1     |
| NMO9 vs. SLE14       | 0.0268  | 1     |
| NMO9 vs. CON3        | 0.0267  | 1     |
| NMO9 vs. NMO15       | 0.0267  | 1     |
| NMO9 vs. CON pool #1 | 0.0232  | 1     |
| NMO9 vs. CON8        | 0.0223  | 1     |
| NMO9 vs. NMO13       | 0.0221  | 1     |
| NMO9 vs. MS2         | 0.0216  | 1     |
| NMO9 vs. MS6         | 0.0212  | 1     |
| NMO9 vs. NMO12       | 0.0211  | 1     |
| NMO9 vs. NMO10       | 0.02    | 1     |
| NMO9 vs. NMO4        | 0.0163  | 1     |
| NMO9 vs. NMO19       | 0.016   | 1     |
| NMO9 vs. NMO11       | 0.0151  | 1     |
| NMO9 vs. NMO16       | 0.0139  | 1     |
| NMO9 vs. SLE4        | 0.0133  | 1     |
| NMO9 vs. MS5         | 0.0125  | 1     |
| NMO9 vs. MS10        | 0.00825 | 1     |
| NMO9 vs. CON6        | 0.00777 | 1     |
| NMO9 vs. CON7        | 0.00776 | 1     |
| NMO9 vs. MS1         | 0.00436 | 1     |
| NMO9 vs. CON5        | 0.00394 | 1     |
| NMO9 vs. NMO17       | 0.002   | 1     |
| NMO9 vs. CON1        | 0.00176 | 0.999 |
| CON1 vs. SLE17       | 0.0931  | 1     |
| CON1 vs. SLE16       | 0.0881  | 1     |
| CON1 vs. CON pool #2 | 0.0683  | 1     |
| CON1 vs. SLE18       | 0.0672  | 1     |
| CON1 vs. SLE9        | 0.0649  | 1     |
| CON1 vs. SLE6        | 0.0615  | 1     |
| CON1 vs. SLE5        | 0.0603  | 1     |
| CON1 vs. SLE3        | 0.0552  | 1     |
| CON1 vs. SLE10       | 0.0541  | 1     |
| CON1 vs. CON pool #1 | 0.0529  | 1     |
| CON1 vs. SLE15       | 0.0476  | 1     |
| CON1 vs. RRMS pool   | 0.042   | 1     |
| CON1 vs. SLE2        | 0.0408  | 1     |
| CON1 vs. SLE7        | 0.0376  | 1     |
| CON1 vs. MS4         | 0.0326  | 1     |
| CON1 vs. CON2        | 0.0324  | 1     |
| CON1 vs. SLE13       | 0.0309  | 1     |
| CON1 vs. SLE12       | 0.0297  | 1     |
| CON1 vs. NMO20       | 0.0292  | 1     |
| CON1 vs. SLE14       | 0.0251  | 1     |
| CON1 vs. CON3        | 0.0249  | 1     |
| CON1 vs. NMO15       | 0.0249  | 1     |
| CON1 vs. CON pool #1 | 0.0214  | 1     |
| CON1 vs. CON8        | 0.0205  | 1     |
| CON1 vs. NMO13       | 0.0203  | 1     |
| CON1 vs. MS2         | 0.0199  | 1     |
| CON1 vs. MS6         | 0.0194  | 1     |
| CON1 vs. NMO12       | 0.0194  | 1     |
| CON1 vs. NMO10       | 0.0182  | 1     |
| CON1 vs. NMO4        | 0.0145  | 1     |
| CON1 vs. NMO19       | 0.0143  | 1     |
| CON1 vs. NMO11       | 0.0133  | 1     |
| CON1 vs. NMO16       | 0.0122  | 1     |

|                       |          |       |
|-----------------------|----------|-------|
| CON1 vs. SLE4         | 0.0115   | 1     |
| CON1 vs. MS5          | 0.0107   | 1     |
| CON1 vs. MS10         | 0.00649  | 1     |
| CON1 vs. CON6         | 0.00602  | 1     |
| CON1 vs. CON7         | 0.00601  | 1     |
| CON1 vs. MS1          | 0.00261  | 1     |
| CON1 vs. CON5         | 0.00219  | 1     |
| CON1 vs. NMO17        | 0.000247 | 1     |
| NMO17 vs. SLE17       | 0.0929   | 1     |
| NMO17 vs. SLE16       | 0.0878   | 1     |
| NMO17 vs. CON pool #2 | 0.0681   | 1     |
| NMO17 vs. SLE18       | 0.067    | 1     |
| NMO17 vs. SLE9        | 0.0647   | 1     |
| NMO17 vs. SLE6        | 0.0612   | 1     |
| NMO17 vs. SLE5        | 0.0601   | 1     |
| NMO17 vs. SLE3        | 0.0549   | 1     |
| NMO17 vs. SLE10       | 0.0538   | 1     |
| NMO17 vs. CON pool #1 | 0.0527   | 1     |
| NMO17 vs. SLE15       | 0.0474   | 1     |
| NMO17 vs. RRMS pool   | 0.0417   | 1     |
| NMO17 vs. SLE2        | 0.0406   | 1     |
| NMO17 vs. SLE7        | 0.0374   | 1     |
| NMO17 vs. MS4         | 0.0323   | 1     |
| NMO17 vs. CON2        | 0.0321   | 1     |
| NMO17 vs. SLE13       | 0.0307   | 1     |
| NMO17 vs. SLE12       | 0.0295   | 1     |
| NMO17 vs. NMO20       | 0.029    | 1     |
| NMO17 vs. SLE14       | 0.0248   | 1     |
| NMO17 vs. CON3        | 0.0247   | 1     |
| NMO17 vs. NMO15       | 0.0247   | 1     |
| NMO17 vs. CON pool #1 | 0.0212   | 1     |
| NMO17 vs. CON8        | 0.0203   | 1     |
| NMO17 vs. NMO13       | 0.0201   | 1     |
| NMO17 vs. MS2         | 0.0196   | 1     |
| NMO17 vs. MS6         | 0.0192   | 1     |
| NMO17 vs. NMO12       | 0.0191   | 1     |
| NMO17 vs. NMO10       | 0.018    | 1     |
| NMO17 vs. NMO4        | 0.0143   | 1     |
| NMO17 vs. NMO19       | 0.014    | 1     |
| NMO17 vs. NMO11       | 0.0131   | 1     |
| NMO17 vs. NMO16       | 0.0119   | 1     |
| NMO17 vs. SLE4        | 0.0113   | 1     |
| NMO17 vs. MS5         | 0.0105   | 1     |
| NMO17 vs. MS10        | 0.00624  | 1     |
| NMO17 vs. CON6        | 0.00577  | 1     |
| NMO17 vs. CON7        | 0.00576  | 1     |
| NMO17 vs. MS1         | 0.00236  | 1     |
| NMO17 vs. CON5        | 0.00194  | 0.999 |
| CON5 vs. SLE17        | 0.0909   | 1     |
| CON5 vs. SLE16        | 0.0859   | 1     |
| CON5 vs. CON pool #2  | 0.0661   | 1     |
| CON5 vs. SLE18        | 0.065    | 1     |
| CON5 vs. SLE9         | 0.0627   | 1     |
| CON5 vs. SLE6         | 0.0593   | 1     |
| CON5 vs. SLE5         | 0.0581   | 1     |
| CON5 vs. SLE3         | 0.053    | 1     |
| CON5 vs. SLE10        | 0.0519   | 1     |
| CON5 vs. CON pool #1  | 0.0507   | 1     |
| CON5 vs. SLE15        | 0.0454   | 1     |
| CON5 vs. RRMS pool    | 0.0398   | 1     |
| CON5 vs. SLE2         | 0.0386   | 1     |
| CON5 vs. SLE7         | 0.0354   | 1     |
| CON5 vs. MS4          | 0.0304   | 1     |
| CON5 vs. CON2         | 0.0302   | 1     |
| CON5 vs. SLE13        | 0.0287   | 1     |
| CON5 vs. SLE12        | 0.0276   | 1     |

|                      |          |       |
|----------------------|----------|-------|
| CON5 vs. NMO20       | 0.027    | 1     |
| CON5 vs. SLE14       | 0.0229   | 1     |
| CON5 vs. CON3        | 0.0227   | 1     |
| CON5 vs. NMO15       | 0.0227   | 1     |
| CON5 vs. CON pool #1 | 0.0193   | 1     |
| CON5 vs. CON8        | 0.0183   | 1     |
| CON5 vs. NMO13       | 0.0181   | 1     |
| CON5 vs. MS2         | 0.0177   | 1     |
| CON5 vs. MS6         | 0.0172   | 1     |
| CON5 vs. NMO12       | 0.0172   | 1     |
| CON5 vs. NMO10       | 0.0161   | 1     |
| CON5 vs. NMO4        | 0.0123   | 1     |
| CON5 vs. NMO19       | 0.0121   | 1     |
| CON5 vs. NMO11       | 0.0112   | 1     |
| CON5 vs. NMO16       | 0.00998  | 1     |
| CON5 vs. SLE4        | 0.00933  | 1     |
| CON5 vs. MS5         | 0.00855  | 1     |
| CON5 vs. MS10        | 0.0043   | 1     |
| CON5 vs. CON6        | 0.00383  | 1     |
| CON5 vs. CON7        | 0.00382  | 1     |
| CON5 vs. MS1         | 0.000419 | 1     |
| MS1 vs. SLE17        | 0.0905   | 1     |
| MS1 vs. SLE16        | 0.0855   | 1     |
| MS1 vs. CON pool #2  | 0.0657   | 1     |
| MS1 vs. SLE18        | 0.0646   | 1     |
| MS1 vs. SLE9         | 0.0623   | 1     |
| MS1 vs. SLE6         | 0.0589   | 1     |
| MS1 vs. SLE5         | 0.0577   | 1     |
| MS1 vs. SLE3         | 0.0526   | 1     |
| MS1 vs. SLE10        | 0.0514   | 1     |
| MS1 vs. CON pool #1  | 0.0503   | 1     |
| MS1 vs. SLE15        | 0.045    | 1     |
| MS1 vs. RRMS pool    | 0.0394   | 1     |
| MS1 vs. SLE2         | 0.0382   | 1     |
| MS1 vs. SLE7         | 0.035    | 1     |
| MS1 vs. MS4          | 0.03     | 1     |
| MS1 vs. CON2         | 0.0298   | 1     |
| MS1 vs. SLE13        | 0.0283   | 1     |
| MS1 vs. SLE12        | 0.0271   | 1     |
| MS1 vs. NMO20        | 0.0266   | 1     |
| MS1 vs. SLE14        | 0.0225   | 1     |
| MS1 vs. CON3         | 0.0223   | 1     |
| MS1 vs. NMO15        | 0.0223   | 1     |
| MS1 vs. CON pool #1  | 0.0188   | 1     |
| MS1 vs. CON8         | 0.0179   | 1     |
| MS1 vs. NMO13        | 0.0177   | 1     |
| MS1 vs. MS2          | 0.0173   | 1     |
| MS1 vs. MS6          | 0.0168   | 1     |
| MS1 vs. NMO12        | 0.0168   | 1     |
| MS1 vs. NMO10        | 0.0156   | 1     |
| MS1 vs. NMO4         | 0.0119   | 1     |
| MS1 vs. NMO19        | 0.0117   | 1     |
| MS1 vs. NMO11        | 0.0107   | 1     |
| MS1 vs. NMO16        | 0.00956  | 1     |
| MS1 vs. SLE4         | 0.00891  | 1     |
| MS1 vs. MS5          | 0.00813  | 1     |
| MS1 vs. MS10         | 0.00388  | 1     |
| MS1 vs. CON6         | 0.00341  | 1     |
| MS1 vs. CON7         | 0.0034   | 0.998 |
| CON7 vs. SLE17       | 0.0871   | 1     |
| CON7 vs. SLE16       | 0.0821   | 1     |
| CON7 vs. CON pool #2 | 0.0623   | 1     |
| CON7 vs. SLE18       | 0.0612   | 1     |
| CON7 vs. SLE9        | 0.0589   | 1     |
| CON7 vs. SLE6        | 0.0555   | 1     |
| CON7 vs. SLE5        | 0.0543   | 1     |

|                      |           |   |
|----------------------|-----------|---|
| CON7 vs. SLE3        | 0.0492    | 1 |
| CON7 vs. SLE10       | 0.048     | 1 |
| CON7 vs. CON pool #1 | 0.0469    | 1 |
| CON7 vs. SLE15       | 0.0416    | 1 |
| CON7 vs. RRMS pool   | 0.036     | 1 |
| CON7 vs. SLE2        | 0.0348    | 1 |
| CON7 vs. SLE7        | 0.0316    | 1 |
| CON7 vs. MS4         | 0.0266    | 1 |
| CON7 vs. CON2        | 0.0264    | 1 |
| CON7 vs. SLE13       | 0.0249    | 1 |
| CON7 vs. SLE12       | 0.0237    | 1 |
| CON7 vs. NMO20       | 0.0232    | 1 |
| CON7 vs. SLE14       | 0.0191    | 1 |
| CON7 vs. CON3        | 0.0189    | 1 |
| CON7 vs. NMO15       | 0.0189    | 1 |
| CON7 vs. CON pool #1 | 0.0154    | 1 |
| CON7 vs. CON8        | 0.0145    | 1 |
| CON7 vs. NMO13       | 0.0143    | 1 |
| CON7 vs. MS2         | 0.0139    | 1 |
| CON7 vs. MS6         | 0.0134    | 1 |
| CON7 vs. NMO12       | 0.0134    | 1 |
| CON7 vs. NMO10       | 0.0122    | 1 |
| CON7 vs. NMO4        | 0.0085    | 1 |
| CON7 vs. NMO19       | 0.00828   | 1 |
| CON7 vs. NMO11       | 0.00734   | 1 |
| CON7 vs. NMO16       | 0.00616   | 1 |
| CON7 vs. SLE4        | 0.00552   | 1 |
| CON7 vs. MS5         | 0.00473   | 1 |
| CON7 vs. MS10        | 0.000485  | 1 |
| CON7 vs. CON6        | 0.0000138 | 1 |
| CON6 vs. SLE17       | 0.0871    | 1 |
| CON6 vs. SLE16       | 0.082     | 1 |
| CON6 vs. CON pool #2 | 0.0623    | 1 |
| CON6 vs. SLE18       | 0.0612    | 1 |
| CON6 vs. SLE9        | 0.0589    | 1 |
| CON6 vs. SLE6        | 0.0555    | 1 |
| CON6 vs. SLE5        | 0.0543    | 1 |
| CON6 vs. SLE3        | 0.0492    | 1 |
| CON6 vs. SLE10       | 0.048     | 1 |
| CON6 vs. CON pool #1 | 0.0469    | 1 |
| CON6 vs. SLE15       | 0.0416    | 1 |
| CON6 vs. RRMS pool   | 0.036     | 1 |
| CON6 vs. SLE2        | 0.0348    | 1 |
| CON6 vs. SLE7        | 0.0316    | 1 |
| CON6 vs. MS4         | 0.0266    | 1 |
| CON6 vs. CON2        | 0.0264    | 1 |
| CON6 vs. SLE13       | 0.0249    | 1 |
| CON6 vs. SLE12       | 0.0237    | 1 |
| CON6 vs. NMO20       | 0.0232    | 1 |
| CON6 vs. SLE14       | 0.0191    | 1 |
| CON6 vs. CON3        | 0.0189    | 1 |
| CON6 vs. NMO15       | 0.0189    | 1 |
| CON6 vs. CON pool #1 | 0.0154    | 1 |
| CON6 vs. CON8        | 0.0145    | 1 |
| CON6 vs. NMO13       | 0.0143    | 1 |
| CON6 vs. MS2         | 0.0138    | 1 |
| CON6 vs. MS6         | 0.0134    | 1 |
| CON6 vs. NMO12       | 0.0134    | 1 |
| CON6 vs. NMO10       | 0.0122    | 1 |
| CON6 vs. NMO4        | 0.00849   | 1 |
| CON6 vs. NMO19       | 0.00827   | 1 |
| CON6 vs. NMO11       | 0.00733   | 1 |
| CON6 vs. NMO16       | 0.00615   | 1 |
| CON6 vs. SLE4        | 0.0055    | 1 |
| CON6 vs. MS5         | 0.00472   | 1 |
| CON6 vs. MS10        | 0.000471  | 1 |

|                      |         |       |
|----------------------|---------|-------|
| MS10 vs. SLE17       | 0.0866  | 1     |
| MS10 vs. SLE16       | 0.0816  | 1     |
| MS10 vs. CON pool #2 | 0.0618  | 1     |
| MS10 vs. SLE18       | 0.0607  | 1     |
| MS10 vs. SLE9        | 0.0584  | 1     |
| MS10 vs. SLE6        | 0.055   | 1     |
| MS10 vs. SLE5        | 0.0538  | 1     |
| MS10 vs. SLE3        | 0.0487  | 1     |
| MS10 vs. SLE10       | 0.0476  | 1     |
| MS10 vs. CON pool #1 | 0.0464  | 1     |
| MS10 vs. SLE15       | 0.0411  | 1     |
| MS10 vs. RRMS pool   | 0.0355  | 1     |
| MS10 vs. SLE2        | 0.0343  | 1     |
| MS10 vs. SLE7        | 0.0311  | 1     |
| MS10 vs. MS4         | 0.0261  | 1     |
| MS10 vs. CON2        | 0.0259  | 1     |
| MS10 vs. SLE13       | 0.0244  | 1     |
| MS10 vs. SLE12       | 0.0233  | 1     |
| MS10 vs. NMO20       | 0.0227  | 1     |
| MS10 vs. SLE14       | 0.0186  | 1     |
| MS10 vs. CON3        | 0.0184  | 1     |
| MS10 vs. NMO15       | 0.0184  | 1     |
| MS10 vs. CON pool #1 | 0.015   | 1     |
| MS10 vs. CON8        | 0.014   | 1     |
| MS10 vs. NMO13       | 0.0138  | 1     |
| MS10 vs. MS2         | 0.0134  | 1     |
| MS10 vs. MS6         | 0.0129  | 1     |
| MS10 vs. NMO12       | 0.0129  | 1     |
| MS10 vs. NMO10       | 0.0118  | 1     |
| MS10 vs. NMO4        | 0.00802 | 1     |
| MS10 vs. NMO19       | 0.0078  | 1     |
| MS10 vs. NMO11       | 0.00686 | 1     |
| MS10 vs. NMO16       | 0.00568 | 1     |
| MS10 vs. SLE4        | 0.00503 | 1     |
| MS10 vs. MS5         | 0.00424 | 0.998 |
| MS5 vs. SLE17        | 0.0824  | 1     |
| MS5 vs. SLE16        | 0.0773  | 1     |
| MS5 vs. CON pool #2  | 0.0576  | 1     |
| MS5 vs. SLE18        | 0.0565  | 1     |
| MS5 vs. SLE9         | 0.0542  | 1     |
| MS5 vs. SLE6         | 0.0507  | 1     |
| MS5 vs. SLE5         | 0.0496  | 1     |
| MS5 vs. SLE3         | 0.0444  | 1     |
| MS5 vs. SLE10        | 0.0433  | 1     |
| MS5 vs. CON pool #1  | 0.0422  | 1     |
| MS5 vs. SLE15        | 0.0369  | 1     |
| MS5 vs. RRMS pool    | 0.0312  | 1     |
| MS5 vs. SLE2         | 0.0301  | 1     |
| MS5 vs. SLE7         | 0.0269  | 1     |
| MS5 vs. MS4          | 0.0219  | 1     |
| MS5 vs. CON2         | 0.0216  | 1     |
| MS5 vs. SLE13        | 0.0202  | 1     |
| MS5 vs. SLE12        | 0.019   | 1     |
| MS5 vs. NMO20        | 0.0185  | 1     |
| MS5 vs. SLE14        | 0.0143  | 1     |
| MS5 vs. CON3         | 0.0142  | 1     |
| MS5 vs. NMO15        | 0.0142  | 1     |
| MS5 vs. CON pool #1  | 0.0107  | 1     |
| MS5 vs. CON8         | 0.0098  | 1     |
| MS5 vs. NMO13        | 0.00959 | 1     |
| MS5 vs. MS2          | 0.00913 | 1     |
| MS5 vs. MS6          | 0.00867 | 1     |
| MS5 vs. NMO12        | 0.00865 | 1     |
| MS5 vs. NMO10        | 0.00751 | 1     |
| MS5 vs. NMO4         | 0.00377 | 1     |
| MS5 vs. NMO19        | 0.00356 | 1     |

|                       |          |   |
|-----------------------|----------|---|
| MS5 vs. NMO11         | 0.00261  | 1 |
| MS5 vs. NMO16         | 0.00143  | 1 |
| MS5 vs. SLE4          | 0.000787 | 1 |
| SLE4 vs. SLE17        | 0.0816   | 1 |
| SLE4 vs. SLE16        | 0.0765   | 1 |
| SLE4 vs. CON pool #2  | 0.0568   | 1 |
| SLE4 vs. SLE18        | 0.0557   | 1 |
| SLE4 vs. SLE9         | 0.0534   | 1 |
| SLE4 vs. SLE6         | 0.05     | 1 |
| SLE4 vs. SLE5         | 0.0488   | 1 |
| SLE4 vs. SLE3         | 0.0437   | 1 |
| SLE4 vs. SLE10        | 0.0425   | 1 |
| SLE4 vs. CON pool #1  | 0.0414   | 1 |
| SLE4 vs. SLE15        | 0.0361   | 1 |
| SLE4 vs. RRMS pool    | 0.0305   | 1 |
| SLE4 vs. SLE2         | 0.0293   | 1 |
| SLE4 vs. SLE7         | 0.0261   | 1 |
| SLE4 vs. MS4          | 0.0211   | 1 |
| SLE4 vs. CON2         | 0.0209   | 1 |
| SLE4 vs. SLE13        | 0.0194   | 1 |
| SLE4 vs. SLE12        | 0.0182   | 1 |
| SLE4 vs. NMO20        | 0.0177   | 1 |
| SLE4 vs. SLE14        | 0.0135   | 1 |
| SLE4 vs. CON3         | 0.0134   | 1 |
| SLE4 vs. NMO15        | 0.0134   | 1 |
| SLE4 vs. CON pool #1  | 0.00993  | 1 |
| SLE4 vs. CON8         | 0.00901  | 1 |
| SLE4 vs. NMO13        | 0.00881  | 1 |
| SLE4 vs. MS2          | 0.00835  | 1 |
| SLE4 vs. MS6          | 0.00788  | 1 |
| SLE4 vs. NMO12        | 0.00786  | 1 |
| SLE4 vs. NMO10        | 0.00672  | 1 |
| SLE4 vs. NMO4         | 0.00298  | 1 |
| SLE4 vs. NMO19        | 0.00277  | 1 |
| SLE4 vs. NMO11        | 0.00182  | 1 |
| SLE4 vs. NMO16        | 0.000645 | 1 |
| NMO16 vs. SLE17       | 0.0809   | 1 |
| NMO16 vs. SLE16       | 0.0759   | 1 |
| NMO16 vs. CON pool #2 | 0.0562   | 1 |
| NMO16 vs. SLE18       | 0.055    | 1 |
| NMO16 vs. SLE9        | 0.0528   | 1 |
| NMO16 vs. SLE6        | 0.0493   | 1 |
| NMO16 vs. SLE5        | 0.0481   | 1 |
| NMO16 vs. SLE3        | 0.043    | 1 |
| NMO16 vs. SLE10       | 0.0419   | 1 |
| NMO16 vs. CON pool #1 | 0.0408   | 1 |
| NMO16 vs. SLE15       | 0.0355   | 1 |
| NMO16 vs. RRMS pool   | 0.0298   | 1 |
| NMO16 vs. SLE2        | 0.0286   | 1 |
| NMO16 vs. SLE7        | 0.0255   | 1 |
| NMO16 vs. MS4         | 0.0204   | 1 |
| NMO16 vs. CON2        | 0.0202   | 1 |
| NMO16 vs. SLE13       | 0.0188   | 1 |
| NMO16 vs. SLE12       | 0.0176   | 1 |
| NMO16 vs. NMO20       | 0.0171   | 1 |
| NMO16 vs. SLE14       | 0.0129   | 1 |
| NMO16 vs. CON3        | 0.0127   | 1 |
| NMO16 vs. NMO15       | 0.0127   | 1 |
| NMO16 vs. CON pool #1 | 0.00928  | 1 |
| NMO16 vs. CON8        | 0.00837  | 1 |
| NMO16 vs. NMO13       | 0.00816  | 1 |
| NMO16 vs. MS2         | 0.0077   | 1 |
| NMO16 vs. MS6         | 0.00723  | 1 |
| NMO16 vs. NMO12       | 0.00722  | 1 |
| NMO16 vs. NMO10       | 0.00608  | 1 |
| NMO16 vs. NMO4        | 0.00234  | 1 |

|                       |          |       |
|-----------------------|----------|-------|
| NMO16 vs. NMO19       | 0.00212  | 1     |
| NMO16 vs. NMO11       | 0.00118  | 0.999 |
| NMO11 vs. SLE17       | 0.0798   | 1     |
| NMO11 vs. SLE16       | 0.0747   | 1     |
| NMO11 vs. CON pool #2 | 0.055    | 1     |
| NMO11 vs. SLE18       | 0.0539   | 1     |
| NMO11 vs. SLE9        | 0.0516   | 1     |
| NMO11 vs. SLE6        | 0.0481   | 1     |
| NMO11 vs. SLE5        | 0.047    | 1     |
| NMO11 vs. SLE3        | 0.0418   | 1     |
| NMO11 vs. SLE10       | 0.0407   | 1     |
| NMO11 vs. CON pool #1 | 0.0396   | 1     |
| NMO11 vs. SLE15       | 0.0343   | 1     |
| NMO11 vs. RRMS pool   | 0.0286   | 1     |
| NMO11 vs. SLE2        | 0.0275   | 1     |
| NMO11 vs. SLE7        | 0.0243   | 1     |
| NMO11 vs. MS4         | 0.0192   | 1     |
| NMO11 vs. CON2        | 0.019    | 1     |
| NMO11 vs. SLE13       | 0.0176   | 1     |
| NMO11 vs. SLE12       | 0.0164   | 1     |
| NMO11 vs. NMO20       | 0.0159   | 1     |
| NMO11 vs. SLE14       | 0.0117   | 1     |
| NMO11 vs. CON3        | 0.0116   | 1     |
| NMO11 vs. NMO15       | 0.0116   | 1     |
| NMO11 vs. CON pool #1 | 0.0081   | 1     |
| NMO11 vs. CON8        | 0.00719  | 1     |
| NMO11 vs. NMO13       | 0.00698  | 1     |
| NMO11 vs. MS2         | 0.00652  | 1     |
| NMO11 vs. MS6         | 0.00605  | 1     |
| NMO11 vs. NMO12       | 0.00604  | 1     |
| NMO11 vs. NMO10       | 0.0049   | 1     |
| NMO11 vs. NMO4        | 0.00116  | 1     |
| NMO11 vs. NMO19       | 0.000943 | 0.999 |
| NMO19 vs. SLE17       | 0.0788   | 1     |
| NMO19 vs. SLE16       | 0.0738   | 1     |
| NMO19 vs. CON pool #2 | 0.054    | 1     |
| NMO19 vs. SLE18       | 0.0529   | 1     |
| NMO19 vs. SLE9        | 0.0506   | 1     |
| NMO19 vs. SLE6        | 0.0472   | 1     |
| NMO19 vs. SLE5        | 0.046    | 1     |
| NMO19 vs. SLE3        | 0.0409   | 1     |
| NMO19 vs. SLE10       | 0.0398   | 1     |
| NMO19 vs. CON pool #1 | 0.0386   | 1     |
| NMO19 vs. SLE15       | 0.0333   | 1     |
| NMO19 vs. RRMS pool   | 0.0277   | 1     |
| NMO19 vs. SLE2        | 0.0265   | 1     |
| NMO19 vs. SLE7        | 0.0233   | 1     |
| NMO19 vs. MS4         | 0.0183   | 1     |
| NMO19 vs. CON2        | 0.0181   | 1     |
| NMO19 vs. SLE13       | 0.0166   | 1     |
| NMO19 vs. SLE12       | 0.0155   | 1     |
| NMO19 vs. NMO20       | 0.0149   | 1     |
| NMO19 vs. SLE14       | 0.0108   | 1     |
| NMO19 vs. CON3        | 0.0106   | 1     |
| NMO19 vs. NMO15       | 0.0106   | 1     |
| NMO19 vs. CON pool #1 | 0.00716  | 1     |
| NMO19 vs. CON8        | 0.00624  | 1     |
| NMO19 vs. NMO13       | 0.00604  | 1     |
| NMO19 vs. MS2         | 0.00558  | 1     |
| NMO19 vs. MS6         | 0.00511  | 1     |
| NMO19 vs. NMO12       | 0.0051   | 1     |
| NMO19 vs. NMO10       | 0.00396  | 1     |
| NMO19 vs. NMO4        | 0.000217 | 1     |
| NMO4 vs. SLE17        | 0.0786   | 1     |
| NMO4 vs. SLE16        | 0.0736   | 1     |
| NMO4 vs. CON pool #2  | 0.0538   | 1     |



|                       |         |       |
|-----------------------|---------|-------|
| NMO4 vs. SLE18        | 0.0527  | 1     |
| NMO4 vs. SLE9         | 0.0504  | 1     |
| NMO4 vs. SLE6         | 0.047   | 1     |
| NMO4 vs. SLE5         | 0.0458  | 1     |
| NMO4 vs. SLE3         | 0.0407  | 1     |
| NMO4 vs. SLE10        | 0.0395  | 1     |
| NMO4 vs. CON pool #1  | 0.0384  | 1     |
| NMO4 vs. SLE15        | 0.0331  | 1     |
| NMO4 vs. RRMS pool    | 0.0275  | 1     |
| NMO4 vs. SLE2         | 0.0263  | 1     |
| NMO4 vs. SLE7         | 0.0231  | 1     |
| NMO4 vs. MS4          | 0.0181  | 1     |
| NMO4 vs. CON2         | 0.0179  | 1     |
| NMO4 vs. SLE13        | 0.0164  | 1     |
| NMO4 vs. SLE12        | 0.0152  | 1     |
| NMO4 vs. NMO20        | 0.0147  | 1     |
| NMO4 vs. SLE14        | 0.0106  | 1     |
| NMO4 vs. CON3         | 0.0104  | 1     |
| NMO4 vs. NMO15        | 0.0104  | 1     |
| NMO4 vs. CON pool #1  | 0.00694 | 1     |
| NMO4 vs. CON8         | 0.00603 | 1     |
| NMO4 vs. NMO13        | 0.00582 | 1     |
| NMO4 vs. MS2          | 0.00536 | 1     |
| NMO4 vs. MS6          | 0.00489 | 1     |
| NMO4 vs. NMO12        | 0.00488 | 1     |
| NMO4 vs. NMO10        | 0.00374 | 0.998 |
| NMO10 vs. SLE17       | 0.0749  | 1     |
| NMO10 vs. SLE16       | 0.0698  | 1     |
| NMO10 vs. CON pool #2 | 0.0501  | 1     |
| NMO10 vs. SLE18       | 0.049   | 1     |
| NMO10 vs. SLE9        | 0.0467  | 1     |
| NMO10 vs. SLE6        | 0.0432  | 1     |
| NMO10 vs. SLE5        | 0.0421  | 1     |
| NMO10 vs. SLE3        | 0.0369  | 1     |
| NMO10 vs. SLE10       | 0.0358  | 1     |
| NMO10 vs. CON pool #1 | 0.0347  | 1     |
| NMO10 vs. SLE15       | 0.0294  | 1     |
| NMO10 vs. RRMS pool   | 0.0237  | 1     |
| NMO10 vs. SLE2        | 0.0226  | 1     |
| NMO10 vs. SLE7        | 0.0194  | 1     |
| NMO10 vs. MS4         | 0.0143  | 1     |
| NMO10 vs. CON2        | 0.0141  | 1     |
| NMO10 vs. SLE13       | 0.0127  | 1     |
| NMO10 vs. SLE12       | 0.0115  | 1     |
| NMO10 vs. NMO20       | 0.011   | 1     |
| NMO10 vs. SLE14       | 0.00682 | 1     |
| NMO10 vs. CON3        | 0.00666 | 1     |
| NMO10 vs. NMO15       | 0.00665 | 1     |
| NMO10 vs. CON pool #1 | 0.0032  | 1     |
| NMO10 vs. CON8        | 0.00229 | 1     |
| NMO10 vs. NMO13       | 0.00208 | 1     |
| NMO10 vs. MS2         | 0.00162 | 1     |
| NMO10 vs. MS6         | 0.00115 | 1     |
| NMO10 vs. NMO12       | 0.00114 | 0.999 |
| NMO12 vs. SLE17       | 0.0737  | 1     |
| NMO12 vs. SLE16       | 0.0687  | 1     |
| NMO12 vs. CON pool #2 | 0.0489  | 1     |
| NMO12 vs. SLE18       | 0.0478  | 1     |
| NMO12 vs. SLE9        | 0.0455  | 1     |
| NMO12 vs. SLE6        | 0.0421  | 1     |
| NMO12 vs. SLE5        | 0.0409  | 1     |
| NMO12 vs. SLE3        | 0.0358  | 1     |
| NMO12 vs. SLE10       | 0.0347  | 1     |
| NMO12 vs. CON pool #1 | 0.0335  | 1     |
| NMO12 vs. SLE15       | 0.0282  | 1     |
| NMO12 vs. RRMS pool   | 0.0226  | 1     |

|                       |           |   |
|-----------------------|-----------|---|
| NMO12 vs. SLE2        | 0.0214    | 1 |
| NMO12 vs. SLE7        | 0.0182    | 1 |
| NMO12 vs. MS4         | 0.0132    | 1 |
| NMO12 vs. CON2        | 0.013     | 1 |
| NMO12 vs. SLE13       | 0.0115    | 1 |
| NMO12 vs. SLE12       | 0.0104    | 1 |
| NMO12 vs. NMO20       | 0.00984   | 1 |
| NMO12 vs. SLE14       | 0.00568   | 1 |
| NMO12 vs. CON3        | 0.00552   | 1 |
| NMO12 vs. NMO15       | 0.00551   | 1 |
| NMO12 vs. CON pool #1 | 0.00206   | 1 |
| NMO12 vs. CON8        | 0.00115   | 1 |
| NMO12 vs. NMO13       | 0.00094   | 1 |
| NMO12 vs. MS2         | 0.00048   | 1 |
| NMO12 vs. MS6         | 0.0000145 | 1 |
| MS6 vs. SLE17         | 0.0737    | 1 |
| MS6 vs. SLE16         | 0.0687    | 1 |
| MS6 vs. CON pool #2   | 0.0489    | 1 |
| MS6 vs. SLE18         | 0.0478    | 1 |
| MS6 vs. SLE9          | 0.0455    | 1 |
| MS6 vs. SLE6          | 0.0421    | 1 |
| MS6 vs. SLE5          | 0.0409    | 1 |
| MS6 vs. SLE3          | 0.0358    | 1 |
| MS6 vs. SLE10         | 0.0347    | 1 |
| MS6 vs. CON pool #1   | 0.0335    | 1 |
| MS6 vs. SLE15         | 0.0282    | 1 |
| MS6 vs. RRMS pool     | 0.0226    | 1 |
| MS6 vs. SLE2          | 0.0214    | 1 |
| MS6 vs. SLE7          | 0.0182    | 1 |
| MS6 vs. MS4           | 0.0132    | 1 |
| MS6 vs. CON2          | 0.013     | 1 |
| MS6 vs. SLE13         | 0.0115    | 1 |
| MS6 vs. SLE12         | 0.0103    | 1 |
| MS6 vs. NMO20         | 0.00983   | 1 |
| MS6 vs. SLE14         | 0.00567   | 1 |
| MS6 vs. CON3          | 0.00551   | 1 |
| MS6 vs. NMO15         | 0.0055    | 1 |
| MS6 vs. CON pool #1   | 0.00205   | 1 |
| MS6 vs. CON8          | 0.00113   | 1 |
| MS6 vs. NMO13         | 0.000926  | 1 |
| MS6 vs. MS2           | 0.000466  | 1 |
| MS2 vs. SLE17         | 0.0732    | 1 |
| MS2 vs. SLE16         | 0.0682    | 1 |
| MS2 vs. CON pool #2   | 0.0485    | 1 |
| MS2 vs. SLE18         | 0.0473    | 1 |
| MS2 vs. SLE9          | 0.0451    | 1 |
| MS2 vs. SLE6          | 0.0416    | 1 |
| MS2 vs. SLE5          | 0.0404    | 1 |
| MS2 vs. SLE3          | 0.0353    | 1 |
| MS2 vs. SLE10         | 0.0342    | 1 |
| MS2 vs. CON pool #1   | 0.0331    | 1 |
| MS2 vs. SLE15         | 0.0278    | 1 |
| MS2 vs. RRMS pool     | 0.0221    | 1 |
| MS2 vs. SLE2          | 0.0209    | 1 |
| MS2 vs. SLE7          | 0.0178    | 1 |
| MS2 vs. MS4           | 0.0127    | 1 |
| MS2 vs. CON2          | 0.0125    | 1 |
| MS2 vs. SLE13         | 0.0111    | 1 |
| MS2 vs. SLE12         | 0.00987   | 1 |
| MS2 vs. NMO20         | 0.00936   | 1 |
| MS2 vs. SLE14         | 0.0052    | 1 |
| MS2 vs. CON3          | 0.00504   | 1 |
| MS2 vs. NMO15         | 0.00503   | 1 |
| MS2 vs. CON pool #1   | 0.00158   | 1 |
| MS2 vs. CON8          | 0.000665  | 1 |
| MS2 vs. NMO13         | 0.00046   | 1 |

|                             |          |       |
|-----------------------------|----------|-------|
| NMO13 vs. SLE17             | 0.0728   | 1     |
| NMO13 vs. SLE16             | 0.0677   | 1     |
| NMO13 vs. CON pool #2       | 0.048    | 1     |
| NMO13 vs. SLE18             | 0.0469   | 1     |
| NMO13 vs. SLE9              | 0.0446   | 1     |
| NMO13 vs. SLE6              | 0.0411   | 1     |
| NMO13 vs. SLE5              | 0.04     | 1     |
| NMO13 vs. SLE3              | 0.0348   | 1     |
| NMO13 vs. SLE10             | 0.0337   | 1     |
| NMO13 vs. CON pool #1       | 0.0326   | 1     |
| NMO13 vs. SLE15             | 0.0273   | 1     |
| NMO13 vs. RRMS pool         | 0.0216   | 1     |
| NMO13 vs. SLE2              | 0.0205   | 1     |
| NMO13 vs. SLE7              | 0.0173   | 1     |
| NMO13 vs. MS4               | 0.0123   | 1     |
| NMO13 vs. CON2              | 0.012    | 1     |
| NMO13 vs. SLE13             | 0.0106   | 1     |
| NMO13 vs. SLE12             | 0.00941  | 1     |
| NMO13 vs. NMO20             | 0.0089   | 1     |
| NMO13 vs. SLE14             | 0.00474  | 1     |
| NMO13 vs. CON3              | 0.00458  | 1     |
| NMO13 vs. NMO15             | 0.00457  | 1     |
| NMO13 vs. CON pool #1       | 0.00112  | 1     |
| NMO13 vs. CON8              | 0.000206 | 1     |
| CON8 vs. SLE17              | 0.0726   | 1     |
| CON8 vs. SLE16              | 0.0675   | 1     |
| CON8 vs. CON pool #2        | 0.0478   | 1     |
| CON8 vs. SLE18              | 0.0467   | 1     |
| CON8 vs. SLE9               | 0.0444   | 1     |
| CON8 vs. SLE6               | 0.0409   | 1     |
| CON8 vs. SLE5               | 0.0398   | 1     |
| CON8 vs. SLE3               | 0.0346   | 1     |
| CON8 vs. SLE10              | 0.0335   | 1     |
| CON8 vs. CON pool #1        | 0.0324   | 1     |
| CON8 vs. SLE15              | 0.0271   | 1     |
| CON8 vs. RRMS pool          | 0.0214   | 1     |
| CON8 vs. SLE2               | 0.0203   | 1     |
| CON8 vs. SLE7               | 0.0171   | 1     |
| CON8 vs. MS4                | 0.0121   | 1     |
| CON8 vs. CON2               | 0.0118   | 1     |
| CON8 vs. SLE13              | 0.0104   | 1     |
| CON8 vs. SLE12              | 0.00921  | 1     |
| CON8 vs. NMO20              | 0.0087   | 1     |
| CON8 vs. SLE14              | 0.00454  | 1     |
| CON8 vs. CON3               | 0.00438  | 1     |
| CON8 vs. NMO15              | 0.00437  | 1     |
| CON8 vs. CON pool #1        | 0.000915 | 0.999 |
| CON pool #1 vs. SLE17       | 0.0717   | 1     |
| CON pool #1 vs. SLE16       | 0.0666   | 1     |
| CON pool #1 vs. CON pool #2 | 0.0469   | 1     |
| CON pool #1 vs. SLE18       | 0.0458   | 1     |
| CON pool #1 vs. SLE9        | 0.0435   | 1     |
| CON pool #1 vs. SLE6        | 0.04     | 1     |
| CON pool #1 vs. SLE5        | 0.0389   | 1     |
| CON pool #1 vs. SLE3        | 0.0337   | 1     |
| CON pool #1 vs. SLE10       | 0.0326   | 1     |
| CON pool #1 vs. CON pool #1 | 0.0315   | 1     |
| CON pool #1 vs. SLE15       | 0.0262   | 1     |
| CON pool #1 vs. RRMS pool   | 0.0205   | 1     |
| CON pool #1 vs. SLE2        | 0.0194   | 1     |
| CON pool #1 vs. SLE7        | 0.0162   | 1     |
| CON pool #1 vs. MS4         | 0.0111   | 1     |
| CON pool #1 vs. CON2        | 0.0109   | 1     |
| CON pool #1 vs. SLE13       | 0.00948  | 1     |
| CON pool #1 vs. SLE12       | 0.00829  | 1     |
| CON pool #1 vs. NMO20       | 0.00778  | 1     |

|                       |           |       |
|-----------------------|-----------|-------|
| CON pool #1 vs. SLE14 | 0.00362   | 1     |
| CON pool #1 vs. CON3  | 0.00346   | 1     |
| CON pool #1 vs. NMO15 | 0.00345   | 0.998 |
| NMO15 vs. SLE17       | 0.0682    | 1     |
| NMO15 vs. SLE16       | 0.0632    | 1     |
| NMO15 vs. CON pool #2 | 0.0434    | 1     |
| NMO15 vs. SLE18       | 0.0423    | 1     |
| NMO15 vs. SLE9        | 0.04      | 1     |
| NMO15 vs. SLE6        | 0.0366    | 1     |
| NMO15 vs. SLE5        | 0.0354    | 1     |
| NMO15 vs. SLE3        | 0.0303    | 1     |
| NMO15 vs. SLE10       | 0.0292    | 1     |
| NMO15 vs. CON pool #1 | 0.028     | 1     |
| NMO15 vs. SLE15       | 0.0227    | 1     |
| NMO15 vs. RRMS pool   | 0.0171    | 1     |
| NMO15 vs. SLE2        | 0.0159    | 1     |
| NMO15 vs. SLE7        | 0.0127    | 1     |
| NMO15 vs. MS4         | 0.00769   | 1     |
| NMO15 vs. CON2        | 0.00747   | 1     |
| NMO15 vs. SLE13       | 0.00603   | 1     |
| NMO15 vs. SLE12       | 0.00484   | 1     |
| NMO15 vs. NMO20       | 0.00433   | 1     |
| NMO15 vs. SLE14       | 0.000173  | 1     |
| NMO15 vs. CON3        | 0.0000131 | 1     |
| CON3 vs. SLE17        | 0.0682    | 1     |
| CON3 vs. SLE16        | 0.0632    | 1     |
| CON3 vs. CON pool #2  | 0.0434    | 1     |
| CON3 vs. SLE18        | 0.0423    | 1     |
| CON3 vs. SLE9         | 0.04      | 1     |
| CON3 vs. SLE6         | 0.0366    | 1     |
| CON3 vs. SLE5         | 0.0354    | 1     |
| CON3 vs. SLE3         | 0.0303    | 1     |
| CON3 vs. SLE10        | 0.0291    | 1     |
| CON3 vs. CON pool #1  | 0.028     | 1     |
| CON3 vs. SLE15        | 0.0227    | 1     |
| CON3 vs. RRMS pool    | 0.0171    | 1     |
| CON3 vs. SLE2         | 0.0159    | 1     |
| CON3 vs. SLE7         | 0.0127    | 1     |
| CON3 vs. MS4          | 0.00768   | 1     |
| CON3 vs. CON2         | 0.00746   | 1     |
| CON3 vs. SLE13        | 0.00602   | 1     |
| CON3 vs. SLE12        | 0.00483   | 1     |
| CON3 vs. NMO20        | 0.00432   | 1     |
| CON3 vs. SLE14        | 0.00016   | 1     |
| SLE14 vs. SLE17       | 0.068     | 1     |
| SLE14 vs. SLE16       | 0.063     | 1     |
| SLE14 vs. CON pool #2 | 0.0433    | 1     |
| SLE14 vs. SLE18       | 0.0421    | 1     |
| SLE14 vs. SLE9        | 0.0399    | 1     |
| SLE14 vs. SLE6        | 0.0364    | 1     |
| SLE14 vs. SLE5        | 0.0352    | 1     |
| SLE14 vs. SLE3        | 0.0301    | 1     |
| SLE14 vs. SLE10       | 0.029     | 1     |
| SLE14 vs. CON pool #1 | 0.0278    | 1     |
| SLE14 vs. SLE15       | 0.0226    | 1     |
| SLE14 vs. RRMS pool   | 0.0169    | 1     |
| SLE14 vs. SLE2        | 0.0157    | 1     |
| SLE14 vs. SLE7        | 0.0125    | 1     |
| SLE14 vs. MS4         | 0.00752   | 1     |
| SLE14 vs. CON2        | 0.0073    | 1     |
| SLE14 vs. SLE13       | 0.00586   | 1     |
| SLE14 vs. SLE12       | 0.00467   | 1     |
| SLE14 vs. NMO20       | 0.00416   | 0.998 |
| NMO20 vs. SLE17       | 0.0639    | 1     |
| NMO20 vs. SLE16       | 0.0588    | 1     |
| NMO20 vs. CON pool #2 | 0.0391    | 1     |

|                       |          |       |
|-----------------------|----------|-------|
| NMO20 vs. SLE18       | 0.038    | 1     |
| NMO20 vs. SLE9        | 0.0357   | 1     |
| NMO20 vs. SLE6        | 0.0322   | 1     |
| NMO20 vs. SLE5        | 0.0311   | 1     |
| NMO20 vs. SLE3        | 0.0259   | 1     |
| NMO20 vs. SLE10       | 0.0248   | 1     |
| NMO20 vs. CON pool #1 | 0.0237   | 1     |
| NMO20 vs. SLE15       | 0.0184   | 1     |
| NMO20 vs. RRMS pool   | 0.0127   | 1     |
| NMO20 vs. SLE2        | 0.0116   | 1     |
| NMO20 vs. SLE7        | 0.00839  | 1     |
| NMO20 vs. MS4         | 0.00336  | 1     |
| NMO20 vs. CON2        | 0.00314  | 1     |
| NMO20 vs. SLE13       | 0.0017   | 1     |
| NMO20 vs. SLE12       | 0.000512 | 1     |
| SLE12 vs. SLE17       | 0.0634   | 1     |
| SLE12 vs. SLE16       | 0.0583   | 1     |
| SLE12 vs. CON pool #2 | 0.0386   | 1     |
| SLE12 vs. SLE18       | 0.0375   | 1     |
| SLE12 vs. SLE9        | 0.0352   | 1     |
| SLE12 vs. SLE6        | 0.0317   | 1     |
| SLE12 vs. SLE5        | 0.0306   | 1     |
| SLE12 vs. SLE3        | 0.0254   | 1     |
| SLE12 vs. SLE10       | 0.0243   | 1     |
| SLE12 vs. CON pool #1 | 0.0232   | 1     |
| SLE12 vs. SLE15       | 0.0179   | 1     |
| SLE12 vs. RRMS pool   | 0.0122   | 1     |
| SLE12 vs. SLE2        | 0.0111   | 1     |
| SLE12 vs. SLE7        | 0.00788  | 1     |
| SLE12 vs. MS4         | 0.00285  | 1     |
| SLE12 vs. CON2        | 0.00263  | 1     |
| SLE12 vs. SLE13       | 0.00119  | 0.999 |
| SLE13 vs. SLE17       | 0.0622   | 1     |
| SLE13 vs. SLE16       | 0.0571   | 1     |
| SLE13 vs. CON pool #2 | 0.0374   | 1     |
| SLE13 vs. SLE18       | 0.0363   | 1     |
| SLE13 vs. SLE9        | 0.034    | 1     |
| SLE13 vs. SLE6        | 0.0305   | 1     |
| SLE13 vs. SLE5        | 0.0294   | 1     |
| SLE13 vs. SLE3        | 0.0242   | 1     |
| SLE13 vs. SLE10       | 0.0231   | 1     |
| SLE13 vs. CON pool #1 | 0.022    | 1     |
| SLE13 vs. SLE15       | 0.0167   | 1     |
| SLE13 vs. RRMS pool   | 0.011    | 1     |
| SLE13 vs. SLE2        | 0.00987  | 1     |
| SLE13 vs. SLE7        | 0.00669  | 1     |
| SLE13 vs. MS4         | 0.00165  | 1     |
| SLE13 vs. CON2        | 0.00144  | 0.999 |
| CON2 vs. SLE17        | 0.0607   | 1     |
| CON2 vs. SLE16        | 0.0557   | 1     |
| CON2 vs. CON pool #2  | 0.036    | 1     |
| CON2 vs. SLE18        | 0.0348   | 1     |
| CON2 vs. SLE9         | 0.0326   | 1     |
| CON2 vs. SLE6         | 0.0291   | 1     |
| CON2 vs. SLE5         | 0.0279   | 1     |
| CON2 vs. SLE3         | 0.0228   | 1     |
| CON2 vs. SLE10        | 0.0217   | 1     |
| CON2 vs. CON pool #1  | 0.0205   | 1     |
| CON2 vs. SLE15        | 0.0153   | 1     |
| CON2 vs. RRMS pool    | 0.0096   | 1     |
| CON2 vs. SLE2         | 0.00843  | 1     |
| CON2 vs. SLE7         | 0.00525  | 1     |
| CON2 vs. MS4          | 0.000215 | 1     |
| MS4 vs. SLE17         | 0.0605   | 1     |
| MS4 vs. SLE16         | 0.0555   | 1     |
| MS4 vs. CON pool #2   | 0.0357   | 1     |

|                             |         |       |
|-----------------------------|---------|-------|
| MS4 vs. SLE18               | 0.0346  | 1     |
| MS4 vs. SLE9                | 0.0323  | 1     |
| MS4 vs. SLE6                | 0.0289  | 1     |
| MS4 vs. SLE5                | 0.0277  | 1     |
| MS4 vs. SLE3                | 0.0226  | 1     |
| MS4 vs. SLE10               | 0.0215  | 1     |
| MS4 vs. CON pool #1         | 0.0203  | 1     |
| MS4 vs. SLE15               | 0.015   | 1     |
| MS4 vs. RRMS pool           | 0.00939 | 1     |
| MS4 vs. SLE2                | 0.00822 | 1     |
| MS4 vs. SLE7                | 0.00503 | 0.997 |
| SLE7 vs. SLE17              | 0.0555  | 1     |
| SLE7 vs. SLE16              | 0.0504  | 1     |
| SLE7 vs. CON pool #2        | 0.0307  | 1     |
| SLE7 vs. SLE18              | 0.0296  | 1     |
| SLE7 vs. SLE9               | 0.0273  | 1     |
| SLE7 vs. SLE6               | 0.0239  | 1     |
| SLE7 vs. SLE5               | 0.0227  | 1     |
| SLE7 vs. SLE3               | 0.0176  | 1     |
| SLE7 vs. SLE10              | 0.0164  | 1     |
| SLE7 vs. CON pool #1        | 0.0153  | 1     |
| SLE7 vs. SLE15              | 0.01    | 1     |
| SLE7 vs. RRMS pool          | 0.00435 | 1     |
| SLE7 vs. SLE2               | 0.00318 | 0.998 |
| SLE2 vs. SLE17              | 0.0523  | 1     |
| SLE2 vs. SLE16              | 0.0473  | 1     |
| SLE2 vs. CON pool #2        | 0.0275  | 1     |
| SLE2 vs. SLE18              | 0.0264  | 1     |
| SLE2 vs. SLE9               | 0.0241  | 1     |
| SLE2 vs. SLE6               | 0.0207  | 1     |
| SLE2 vs. SLE5               | 0.0195  | 1     |
| SLE2 vs. SLE3               | 0.0144  | 1     |
| SLE2 vs. SLE10              | 0.0132  | 1     |
| SLE2 vs. CON pool #1        | 0.0121  | 1     |
| SLE2 vs. SLE15              | 0.00683 | 1     |
| SLE2 vs. RRMS pool          | 0.00117 | 0.999 |
| RRMS pool vs. SLE17         | 0.0511  | 1     |
| RRMS pool vs. SLE16         | 0.0461  | 1     |
| RRMS pool vs. CON pool #2   | 0.0264  | 1     |
| RRMS pool vs. SLE18         | 0.0252  | 1     |
| RRMS pool vs. SLE9          | 0.023   | 1     |
| RRMS pool vs. SLE6          | 0.0195  | 1     |
| RRMS pool vs. SLE5          | 0.0183  | 1     |
| RRMS pool vs. SLE3          | 0.0132  | 1     |
| RRMS pool vs. SLE10         | 0.0121  | 1     |
| RRMS pool vs. CON pool #1   | 0.0109  | 1     |
| RRMS pool vs. SLE15         | 0.00566 | 0.997 |
| SLE15 vs. SLE17             | 0.0455  | 1     |
| SLE15 vs. SLE16             | 0.0404  | 1     |
| SLE15 vs. CON pool #2       | 0.0207  | 1     |
| SLE15 vs. SLE18             | 0.0196  | 1     |
| SLE15 vs. SLE9              | 0.0173  | 1     |
| SLE15 vs. SLE6              | 0.0138  | 1     |
| SLE15 vs. SLE5              | 0.0127  | 1     |
| SLE15 vs. SLE3              | 0.00754 | 1     |
| SLE15 vs. SLE10             | 0.00642 | 1     |
| SLE15 vs. CON pool #1       | 0.00528 | 0.997 |
| CON pool #1 vs. SLE17       | 0.0402  | 1     |
| CON pool #1 vs. SLE16       | 0.0351  | 1     |
| CON pool #1 vs. CON pool #2 | 0.0154  | 1     |
| CON pool #1 vs. SLE18       | 0.0143  | 1     |
| CON pool #1 vs. SLE9        | 0.012   | 1     |
| CON pool #1 vs. SLE6        | 0.00856 | 1     |
| CON pool #1 vs. SLE5        | 0.00739 | 1     |
| CON pool #1 vs. SLE3        | 0.00226 | 1     |
| CON pool #1 vs. SLE10       | 0.00113 | 0.999 |

|                       |         |       |
|-----------------------|---------|-------|
| SLE10 vs. SLE17       | 0.0391  | 1     |
| SLE10 vs. SLE16       | 0.034   | 1     |
| SLE10 vs. CON pool #2 | 0.0143  | 1     |
| SLE10 vs. SLE18       | 0.0132  | 1     |
| SLE10 vs. SLE9        | 0.0109  | 1     |
| SLE10 vs. SLE6        | 0.00742 | 1     |
| SLE10 vs. SLE5        | 0.00626 | 1     |
| SLE10 vs. SLE3        | 0.00112 | 0.999 |
| SLE3 vs. SLE17        | 0.0379  | 1     |
| SLE3 vs. SLE16        | 0.0329  | 1     |
| SLE3 vs. CON pool #2  | 0.0132  | 1     |
| SLE3 vs. SLE18        | 0.012   | 1     |
| SLE3 vs. SLE9         | 0.00976 | 1     |
| SLE3 vs. SLE6         | 0.0063  | 1     |
| SLE3 vs. SLE5         | 0.00513 | 0.997 |
| SLE5 vs. SLE17        | 0.0328  | 1     |
| SLE5 vs. SLE16        | 0.0278  | 1     |
| SLE5 vs. CON pool #2  | 0.00802 | 1     |

|                       |         |       |
|-----------------------|---------|-------|
| SLE5 vs. SLE18        | 0.00689 | 1     |
| SLE5 vs. SLE9         | 0.00462 | 1     |
| SLE5 vs. SLE6         | 0.00117 | 0.999 |
| SLE6 vs. SLE17        | 0.0316  | 1     |
| SLE6 vs. SLE16        | 0.0266  | 1     |
| SLE6 vs. CON pool #2  | 0.00685 | 1     |
| SLE6 vs. SLE18        | 0.00573 | 1     |
| SLE6 vs. SLE9         | 0.00346 | 0.998 |
| SLE9 vs. SLE17        | 0.0282  | 1     |
| SLE9 vs. SLE16        | 0.0231  | 1     |
| SLE9 vs. CON pool #2  | 0.0034  | 1     |
| SLE9 vs. SLE18        | 0.00227 | 0.999 |
| SLE18 vs. SLE17       | 0.0259  | 1     |
| SLE18 vs. SLE16       | 0.0209  | 1     |
| SLE18 vs. CON pool #2 | 0.00113 | 0.999 |
| CON pool #2 vs. SLE17 | 0.0248  | 1     |
| CON pool #2 vs. SLE16 | 0.0197  | 0.989 |
| SLE16 vs. SLE17       | 0.00505 | 0.997 |

<sup>a</sup>One-way ANOVA; post hoc Student-Newman-Keuls pairwise comparisons
